1 **Title**

2 A small molecule, ACAi-028, with anti-HIV-1 activity targets a novel  
3 hydrophobic pocket on HIV-1 capsid

4

5 **Running title:** *Anti-HIV-1 agent targets novel pocket on HIV-1 capsid*

6

7 Travis Chia<sup>a#</sup>, Tomofumi Nakamura<sup>a#</sup>, Masayuki Amano<sup>a\*</sup>, Nobutoki Takamune<sup>b</sup>, Masao  
8 Matsuoka<sup>a</sup>, and Hiroto Nakata<sup>a\*</sup>

9

10 <sup>a</sup> Department of Hematology, Rheumatology, and Infectious Diseases, Graduate School of Medical  
11 Sciences, Faculty of Life Sciences, Kumamoto University, Kumamoto 860-8556, Japan.

12 <sup>b</sup> Kumamoto Innovative Development Organization, Kumamoto University, Kumamoto 860-0862,  
13 Japan

14

15 <sup>#</sup> *co-first* authors

16 <sup>\*</sup> Author to whom correspondence should be addressed; E-Mail: mamano@kumamoto-u.ac.jp (M.A.)  
17 and nakatahi@gpo.kumamoto-u.ac.jp (H.N.); Tel.: +81-096-373-5156; Fax: +81-096-373-5158.

18

## 19 **Abstract**

20 The human immunodeficiency virus type 1 (HIV-1) capsid (CA) is an essential viral component of  
21 HIV-1 infection, and an attractive therapeutic target for antivirals. We report that a small molecule,  
22 ACAi-028, inhibits HIV-1 replication by targeting a hydrophobic pocket in the N-terminal domain of  
23 CA (CA-NTD). ACAi-028 is one of more than 40 candidate anti-HIV-1 compounds identified by in  
24 silico screening and 3-(4,5-dimethylthiazol-2-yl)-2,5-diphenyltetrazolium bromide (MTT) assays. Our  
25 binding model showed that ACAi-028 interacts with the Q13, S16, and T19 amino acid residues, via  
26 hydrogen bonds, in the targeting pocket of CA-NTD. Using recombinant fusion methods, TZM-bl,  
27 time-of-addition, and colorimetric reverse transcriptase (RT) assays, the compound was found to exert  
28 anti-HIV-1 activity in the early stage between a reverse transcriptase inhibitor, azidothymidine (AZT),  
29 and an integrase inhibitor, raltegravir (RAL), without any effect on RT activity, suggesting that this  
30 compound may affect HIV-1 core disassembly (uncoating). Moreover, electrospray ionization mass  
31 spectrometry (ESI-MS) also showed that the compound binds directly and non-covalently to the CA  
32 monomer. CA multimerization and thermal stability assays showed that ACAi-028 decreased CA  
33 multimerization and thermal stability via S16 or T19 residues.

## 34 **Importance**

35 These results indicate that ACAi-028 is a novel CA inhibitor that binds to the novel hydrophobic  
36 pocket of CA-NTD. This study demonstrates that a compound targeting the new hydrophobic pocket  
37 is a promising anti-HIV-1 inhibitor. The findings presented here may offer the development of a novel

38 class of anti-viral agents that can be used, providing HIV-1 patients with more options for Anti-  
39 retroviral therapy (ART) treatment. Despite many years of successful pharmaceutical developments in  
40 the area of anti-retroviral therapy, the prevalence of drug-resistant mutations in HIV-1, necessitates  
41 the continued development of novel agents, such as ACAi-028.

42

### 43 **Key words**

44 HIV-1, anti-HIV-1 agent, HIV-1 capsid, *in silico* drug screening

45

### 46 **Introduction**

47 HIV-1 is a retrovirus that has affected humans for half a century, causing 700 000 deaths and 1.7  
48 million new infections in 2019, according to the Joint United Nations Programme on HIV and AIDS  
49 (<https://www.unaids.org/en>). Significant progress has been made in recent years to understand HIV  
50 infection and design drugs to counteract multiple stages of the viral life cycle. Anti-retroviral therapy  
51 (ART) has largely allowed HIV-infected patients to have the same life expectancy as uninfected  
52 individuals (1, 2). Despite of the benefits of ART, HIV-1 often acquires drug-resistant mutations, (3)  
53 resulting in treatment failure. High adherence to ART is required to sustain viral suppression during  
54 HIV clinical treatment (4). It is especially important that we continue to discover new anti-HIV-1  
55 agents that have potent antiviral activity with different mechanisms, providing HIV patients with more  
56 options for ART treatment.

57 The HIV-1 capsid protein (CA) plays an essential role in both the early and late stages of the HIV-1  
58 life cycle. One of the key periods in the early stage is HIV-1 capsid core disassembly, also known as  
59 uncoating (5, 6). After HIV-1 infection of the host cell via CD4 and CXCR4/CCR5 molecules,  
60 uncoating occurs in a regulated manner. The exact mechanism of uncoating remains unclear. Previous  
61 studies have suggested several hypotheses regarding the time and location of uncoating (7). Electron  
62 microscopy results suggest that uncoating occurs near the surface of the plasma membrane (8), while  
63 other studies have suggested that uncoating occurs in the cytoplasm, or tethered to nuclear import (9).  
64 However, recent studies have indicated the possibility that uncoating actually occurs in the nucleus,  
65 and might be coupled with both reverse transcription and integration (10, 11, 12). A new inhibitor of  
66 CA uncoating has the potential to provide novel insights and tools for further research in this field.

67 Representative anti-CA compounds such as CAP-1 (13, 14), PF-3450074 (PF74) (15, 16), ebselen  
68 (17), BD-1, BM-1 (18), I-XW-053 (19), and C1 (20) have been discovered, although none have been  
69 approved for clinical use by the FDA. In this study, we used PF74 and ebselen as control drugs. PF74  
70 is a lead compound of GS-CA1 (21) and lenacapavir, formerly known as GS-6207, (22, 23) that have  
71 been developed by Gilead Sciences, Inc. These compounds interact with the CTD-NTD interface and  
72 hinges between CA monomers, inducing hyperstabilization of the HIV-1 core and inhibiting the  
73 interaction of co-factors, such as Nup153 and CPSF6 (16). Lenacapavir has advanced to phase 2/3 of  
74 the clinical CAPELLA trial (ClinicalTrials.gov Identifier: NCT04150068), and preliminary reports  
75 from this trial indicate that it is effective at reducing the viral load of patients on failing treatment

76 regimens, strongly suggesting that the CA is a viable target for the development of novel anti-HIV-1  
77 compounds. Ebselen is also a unique CA inhibitor that covalently binds to the C-terminal domain of  
78 CA via Cysteine residues, inhibiting HIV-1 activity (17).

79 We previously reported that the insertion of a short amino acid sequence near the Arg18/Thr19 region  
80 of decreased its stability, inducing abnormal CA degradation (24), and identified an adequate  
81 hydrophobic cavity near this region on the surface of CA-NTD, which could be a potential drug target.  
82 To the best of our knowledge, none of the other published anti-CA compounds are known to target  
83 this hydrophobic cavity.

84 In this study, we searched for new compounds capable of interacting with the hydrophobic pocket  
85 from a library containing millions of commercially available compounds via *in silico* docking  
86 simulations. We identified several compounds as candidate HIV-1 inhibitors that were capable of  
87 preventing HIV-1 replication. Here, we highlight ACAi-028, a CA inhibitor with unique molecular  
88 characteristics, which possess potent anti-HIV-1 activity. It is anticipated that both this compound and  
89 the identified binding pocket hold potential therapeutic and research applications.

90

## 91 **Results**

### 92 **Identification of candidate compounds that target a novel hydrophobic cavity of** 93 **the HIV-1 capsid**

94 CA protein consists of the N-terminal domain (CA-NTD, amino acid residues 1-145) and the C-  
95 terminal domain (CA-CTD, residues 151-231) linked via a short flexible region (residues 149-150)  
96 (25, 26, 27). CA-NTD comprises one  $\beta$ -hairpin, seven  $\alpha$ -helices, and a cyclophilin binding loop  
97 (CypA-BL), while CA-CTD has a  $3_{10}$ -helix and four  $\alpha$ -helices, as shown in Fig. 1A. Recently, CA  
98 inhibitors have attracted attention due to the development of lenacapavir, whose lead compound is  
99 PF74 (15), which exhibits a long-acting, strong anti-HIV profile. We have reported that the insertion  
100 of a short amino acid sequence into the CA-NTD, specifically near the R18 and T19 residues, results  
101 in spontaneous CA degradation (24).

102 To identify new capsid inhibitors, we selected a novel hydrophobic pocket (Fig. 1A) near this position  
103 as a potential interaction site for drug candidates with the CA-NTD. *In silico* docking simulations were  
104 performed to search for new compounds that interact with this pocket from a database of over eight  
105 million commercially available compounds. The selection process is illustrated in Figure 1B. More  
106 than 40 compounds were identified as candidate HIV-1 inhibitors that prevented HIV-1<sub>LAI</sub> replication,  
107 using the MTT assay.

108 In this study, we identified ACAi-028 (Fig. 1C), which has a small molecular weight (MW) of 381  
109 g/mol, and potent anti-HIV-1<sub>LAI</sub> activity ( $EC_{50}$ , 0.55  $\mu$ M), among the candidate HIV-1 inhibitors.  
110 Therefore, we examined the anti-HIV profile of ACAi-028.

111 The crystal structure of CA-NTD<sub>1-146/Δ87-99G</sub> was produced (15) (Fig. S1), and the binding profile of  
112 ACAi-028 to the CA-NTD was elucidated using a docking model (Fig. 1D). The binding profile of

113 ACAi-028 with the CA-NTD is similar to that of ACAi-028 with full-length CA (Protein Data Bank  
114 [PDB] accession number 4XFX) (28) (Fig. S2). ACAi-028 is estimated to form two hydrogen bonding  
115 (H-bond) interactions with the side-chains of Q13 and T19 (inter-atomic distances of 1.87 and 1.89 Å,  
116 respectively), and one H-bond interaction with the main chain of S16 (inter-atomic distance of 2.06  
117 Å). This structural arrangement suggests that ACAi-028 could potentially bind to the newly identified  
118 hydrophobic cavity in CA-NTD.

119

## 120 **ACAi-028 inhibits the early stage of the HIV-1 life cycle**

121 Next, we determined the anti-HIV activity ( $EC_{50}$ s) of ACAi-028 against various HIV-1 and HIV-2  
122 strains, in comparison with several compounds that have been previously reported as capsid inhibitors,  
123 such as PF74 (15) and ebselen (17), and an RT inhibitor, AZT (29) (Table 1).

124 ACAi-028 exerted potent anti-HIV-1 activity against single-round HIV-1 infection using VSV-G  
125 pseudo-typed HIV-1<sub>NL4-3</sub> (HIV-1<sub>VSV-G dENV</sub>), suggesting that ACAi-028 inhibits the early stage of the  
126 HIV-1 life cycle. ACAi-028 also prevented multiple-round HIV-1 infection using HIV-1 strains (HIV-  
127 1<sub>NL4-3</sub> and HIV-1<sub>LAI</sub>), except for HIV-2 strain (HIV-2<sub>ROD</sub>), at a concentration similar to that of PF74,  
128 ebselen, and AZT. In addition, ACAi-028 inhibited the replication of various types of HIV-1 strains  
129 (HIV-1<sub>104pre</sub>, HIV-1<sub>MDR/B</sub>) (30) in peripheral blood mononuclear cells (PBMCs) and HIV-1<sub>ATV</sub><sup>R</sup><sub>5μM</sub> in  
130 MT-4 cells (Table 2), and had negligible cytotoxicity in all the cell lines we tested (Table 3).

131 To examine the details of early stage inhibition by ACAi-028, we performed fusion (31), TZM-bl,  
132 time-of-addition (32), and colorimetric RT activity assays. ACAi-028 did not significantly inhibit the  
133 entry step of HIV-1<sub>LAI</sub>, in comparison to the entry inhibitor, AMD3100 (33) (Fig. 2A). ACAi-028 also  
134 displayed strong anti-HIV-1 activity against HIV-1 R5 strains, including HIV-1<sub>Ba-L</sub>, and HIV-1<sub>JR-FL</sub>,  
135 and X4 strains, except for HIV-2<sub>ROD</sub>, using the TZM-bl assay (Fig. 2B).

136 A time-of-addition assay was conducted to compare the inhibition time of ACAi-028 with that of  
137 the other classes of anti-HIV-1 drugs. As expected, AMD3100 ceased displaying anti-HIV-1 activity  
138 when it was added more than 2 h post-infection, while an integrase inhibitor, RAL, significantly  
139 prevented HIV-1 infection beyond 10 h post-infection (Fig. 2C).

140 We observed that ACAi-028 inhibited anti-HIV-1 activity at a similar time as RT inhibitors, AZT and  
141 efavirenz (EFV) (34), as well as a CA inhibitor, PF74. Fifty percent inhibition induced by these drugs  
142 occurred between 4 and 8 h post-infection, which is consistent with a previous report (15). Moreover,  
143 we examined whether ACAi-028 prevents HIV-1 RT activity using a colorimetric RT activity assay  
144 and found that ACAi-028 and PF74 did not have a significant impact on HIV-1 RT activity, in  
145 comparison to EFV (Fig. 2D) *in vitro*. This suggests that ACAi-028 is unlikely to be an RT inhibitor.  
146 Taken together these results indicate that ACAi-028 may have a similar level of potency as a CA  
147 inhibitor as PF74, which affects the CA uncoating process.

148

149 **ACAi-028 does not affect the late stage of the HIV-1 life cycle**



150 To examine the effect of ACAi-028 on late-stage inhibition, we examined whether ACAi-028  
151 affects the process of HIV-1 production, including Gag proteolytic processing and maturation. Forty-  
152 eight hours after transfection of pHIV-1<sub>NL4-3</sub> into 293T cells in the presence of ACAi-028 (10  $\mu$ M),  
153 PF74 (10  $\mu$ M), ebselen (10  $\mu$ M) or, a protease inhibitor, darunavir (DRV) (2  $\mu$ M) (35). Gag proteins  
154 within the cells were observed by western blotting, and viral production was evaluated comparison to  
155 p24 expression levels in the culture supernatant. ACAi-028, PF74, and ebselen did not affect Gag  
156 proteins in the cells, unlike DRV (Fig. 3A), whereas ACAi-028 (88.7%), and ebselen (75.2%), PF74  
157 (62.9%), and DRV (15.7%) reduced HIV-1 production, which is consistent with previous reports (15,  
158 17) (Fig. 3B). Additionally, the effect of ACAi-028 on Gag proteolytic processing and maturation of  
159 HIV-1 virions was investigated using western blotting and the TZM-bl assay. ACAi-028 did not affect  
160 HIV-1 maturation, as observed via western blotting, using anti-Gag or anti-IN antibodies as well as a  
161 DMSO control (Fig. 3C). ACAi-028 did not reduce the viable virions (111.8%), as opposed to DRV  
162 (3.6%) (Fig. 3D), suggesting that ACAi-028 does not have any effect on HIV-1 production and  
163 maturation. On the other hand, a high concentration of PF74 (10  $\mu$ M) did not affect Gag proteins in  
164 the cell lysate (Fig. 3A), but the production level of virions in the presence of PF74 significantly  
165 decreased by 62.9% compared to that of the DMSO control. Furthermore, the infectivity of the virions  
166 was reduced to 6.9% (Fig. 3B and D), suggesting that PF74 affects both the early and late stages, in  
167 agreement with previous reports (15). It has been reported that ebselen does not exhibit late-stage  
168 inhibition (17). Interestingly, premature products such as Gag-pol (p160), Gag-pol intermediate (p120),

169 Gag (p55), and Gag intermediates were found in the virion lysate that was produced at a high  
170 concentration (10  $\mu$ M) of Ebselen, via the western blotting with anti-Gag or anti-IN antibodies, which  
171 is similar to DRV (Fig. 3C). Additionally, the infectivity of the virions produced in the presence of  
172 ebselen (10  $\mu$ M) was significantly reduced by 64.6 % of their normal level (Fig. 3D). These results  
173 suggest that ebselen may interfere with HIV-1 maturation. These results indicate that ACAi-028 is  
174 unlikely to affect the late stage of the HIV-1 life cycle.

175

## 176 **Conformational difference of targeting the hydrophobic pocket between HIV-1** 177 **and HIV-2**

178 ACAi-028 did not show anti-HIV activity against the HIV-2<sub>ROD</sub> strain (Table 1). We compared the  
179 amino acid sequences of experimental HIV-1 strains, such as HIV-1<sub>NL4-3</sub>, HIV-1<sub>HXB (LAI)</sub>, HIV-1<sub>Ba-L</sub>,  
180 and HIV-1<sub>JR-FL</sub>, which are all closely related to simian immunodeficiency virus from chimpanzees  
181 (SIV cpz). Similarly, comparisons of experimental HIV-2 strains, such as HIV-2<sub>ROD</sub> and HIV-2<sub>EHO</sub>,  
182 which are related to SIV sooty mangabeys (SIV smn), as shown in Fig. 4A, were also undertaken. The  
183 Q13, S16, and T19 residues, which are expected to play important roles in ACAi-028 binding to CA  
184 (Fig. 1D), are conserved among all HIV-1 strains and SIV cpz, whereas most of the amino acids from  
185 residues 2 to 15 of HIV-2 are different from those of HIV-1 (Fig. 4A). Moreover, Q13, S16, and T19  
186 residues were highly conserved across 6144 sequences from all HIV-1 subtypes (HIV sequence

187 database filtered web alignment) at conservation rates of 99.89%, 97.85%, and 99.72 %, respectively  
188 (Fig. 4B).

189 The crystal structures of the ACAi-028 target hydrophobic pocket of HIV-1<sub>NL4-3</sub> ([PDB] accession  
190 number 4XFX) (28) and HIV-2<sub>ROD</sub> ([PDB] accession number 2WLV) (36) are shown in Fig. 4C. This  
191 HIV-1<sub>NL4-3</sub> pocket seems to have a sufficient volume for ACAi-028 binding, while that of HIV-2<sub>ROD</sub>  
192 appears to be too shallow for binding (Fig. 4C and Fig. S3). The cavity of CA-NTD<sub>NL4-3</sub> is covered by  
193 that of the CA-NTD<sub>ROD</sub> in the overlay of these crystal structures, as shown in Fig. 4C, suggesting that  
194 the ACAi-028 target volume of HIV-2 is clearly smaller than that of HIV-1.

195 Moreover, we examined the binding ability of ACAi-028 to CA-NTD<sub>ROD</sub> using a binding model. As  
196 shown in Fig. 4D, there were no bridging H-bonds between ACAi-028 and the amino acid residues of  
197 CA-NTD<sub>ROD</sub>, corresponding to the lack of inhibition ( $EC_{50} > 10 \mu\text{M}$ ) of ACAi-028 against HIV-2<sub>ROD</sub>  
198 (Table 1). These results indicate that ACAi-028 may fail to interact with HIV-2<sub>ROD</sub> CA, resulting in  
199 no anti-HIV-2 activity.

200

## 201 **Binding profiles of ACAi-028 to CA proteins.**

202 In order to observe the direct binding of ACAi-028 to CA, we produced recombinant HIV-1<sub>NL4-3</sub>-  
203 derived CA proteins using *E. coli*, and examined the binding of ACAi-028 to these proteins using an  
204 electrospray ionization mass spectrometry (ESI-MS) (37). The ESI-MS spectra of the CA monomer  
205 with 1% methanol revealed nine peaks of charged ions in the range of mass/charge ratio ( $m/z$ ) range

206 of 1,100–1,900 (Fig. 5A). The MW estimated from the peaks of charged irons (deconvoluted ESI-MS  
207 spectrum) was 25601.9 Da, corresponding to the theoretical MW of intact CA monomer (25602.5 Da),  
208 as calculated by Peptide Mass Calculator v3.2 (Fig. 5A). After treatment of CA with ACAi-028, peaks  
209 associated with ACAi-028 binding to CA emerged in the  $m/z$  range of 1,300–1,900 next to each  
210 spectrum of the CA monomer (Fig. 5B). The deconvoluted ESI-MS spectrum revealed a peak  
211 associated with CA and ACAi-028 at 25984.1 Da, which was similar to the sum of the MW of a CA  
212 monomer (25601.9 Da) and ACAi-028 (381 Da) (Fig. 5B). Additionally, we examined whether ACAi-  
213 028 binds covalently to CA. After treatment of CA with ACAi-028 or ebselen, the samples were  
214 denatured by acetonitrile and trifluoroacetic acid. The binding peak of CA with ACAi-028 was not  
215 detected in Fig. 5C, while two strong peaks of CA with ebselen (25922.03 and 26120.59 Da,  
216 representing CA combined with one or two ebselen molecules, respectively) were observed (Fig. 5D).  
217 These results are in line with a previous report (17), suggesting that ACAi-028 binds non-covalently  
218 to CA, unlike ebselen. Thus, ACAi-028 binds directly and non-covalently to the CA monomer.

219

## 220 **ACAi-028 affects the molecular characterization of CA proteins via S16 and T19** 221 **residues.**

222 ACAi-028 was shown to interact directly with the CA proteins using ESI-MS. To investigate how  
223 ACAi-028 interacts with CA proteins, we produced CA variants carrying S16E (CA<sub>S16E</sub>) or T19A  
224 (CA<sub>T19A</sub>) amino acid substitutions, which were intend to alter the binding ability of ACAi-028 to CA.

225 CA<sub>M185A</sub>, carrying an M185A amino acid substitution was also produced as previously reported (38),  
226 as a control.

227 CA thermal stability in the presence of ACAi-028 was examined using differential scanning  
228 fluorimetry (DSF) (39, 40) (Fig. 6). The melting temperature (T<sub>m</sub>) value for proteins generally  
229 indicates the temperature at which the protein is unfolded by 50% folded (T<sub>m</sub> 50). T<sub>m</sub> 50 of wild-type  
230 CA (CA<sub>WT</sub>) increased in the presence of PF74, while that of ACAi-028 clearly decreased by 6.8°C and  
231 7.1°C at 10 and 50 μM, respectively (Fig. 6A and B). T<sub>m</sub> 50 of CA<sub>S16E</sub> showed a mild reduction of  
232 3.9°C at 50 μM, while that of CA<sub>T19A</sub> was seen to remain unchanged in the presence of ACAi-028 (Fig.  
233 6C and D), suggesting that S16 and T19 residues may be associated with the binding of ACAi-028 to  
234 the target pocket of CA-NTD. Additionally, a CA multimerization assay was performed in the presence  
235 of ACAi-028. The treatment of CA<sub>WT</sub> with PF74 increased CA multimerization as previously  
236 described (15), whereas ACAi-028 decreased CA<sub>WT</sub> multimerization at 4 and 40 μM in a  
237 concentration-dependent manner (Fig. 7A). M185A greatly decreased the CA multimerization, in  
238 agreement with, a previous report (38). The addition of S16E substitution to CA proteins slightly  
239 reduced CA<sub>S16E</sub> multimerization, while T19A slightly increased CA<sub>T19A</sub> multimerization in comparison  
240 to CA<sub>WT</sub> (Fig. 7B) at the same sodium concentration, suggesting that these residues significantly affect  
241 the CA multimerization. In the presence of ACAi-028, CA<sub>S16E</sub> multimerization was similar to that of  
242 CA<sub>WT</sub> (Fig. 7C). However, CA<sub>T19A</sub> multimerization was not affected by the presence of ACAi-028,  
243 even at a higher concentration (40 μM) (Fig. 7D), suggesting that the T19A mutant may inhibit ACAi-

244 028 binding to the target pocket under these conditions. These results strongly indicate that ACAi-028  
245 may interact with CA proteins via S16 and T19 residues in the target pocket of CA-NTD.

246

247 **ACAi-028 potentially interacts with the binding pockets of CA in the hexameric**  
248 **state.**

249 ACAi-028 exerted anti-HIV-1 activity in the early stages of the HIV-1 life cycle. In the early stage,  
250 CA proteins constitute a capsid lattice (HIV core), which is composed of approximately 250 hexamers  
251 and exactly 12 pentamers (41). To confirm the location and space of the binding pocket in a CA  
252 hexamer, we analyzed a CA hexamer model in complex with, or without, ACAi-028, based on CA  
253 crystal structures ([PDB] accession number 3H4E (42), and 5MCX (32)). In the model, the ACAi-028  
254 can bind to the pocket located at inside the CA hexamer ([PDB], 3H4E) (Fig. 8A). Additionally, the  
255 ACAi-028 binding profile to the pocket in a CA dimer extract from the CA hexameric state ([PDB],  
256 5MCX) was predicted using our docking model. ACAi-028 can putatively interact with the pocket in  
257 the CA dimer of the CA hexameric state, without affecting the paired CA monomer, via two H-bonds  
258 with L43 and E45 (Fig. 8B). This suggests that ACAi-028 can potentially interact with the binding  
259 pockets of the CA hexameric state, in the HIV-1 core. Taken together, ACAi-028 is a novel capsid  
260 inhibitor that binds to the new hydrophobic pocket in CA-NTD, thereby inhibiting the early stage of  
261 HIV-1 replication.

262

## 263 Discussion

264 Based on the results described above, we concluded that ACAi-028 is a small molecular CA  
265 inhibitor of HIV-1 that interacts with CA via the novel region, which has not been previously reported  
266 (Fig. 9 and Table 4). The ACAi-028 binding pocket is formed by key residues, namely at Gln13, Ser16,  
267 and Thr19, which constitute the  $\beta$ -hairpin end, flexible linker, and front edge of  $\alpha$ -helix 1 (Fig.1). To  
268 understand the mechanisms of action of CA inhibitors previously described (43), we categorized  
269 several candidate CA inhibitors based on their molecular characterization into groups A, B, C, and D  
270 (Fig. 9 and Table 4). CAP-1 (group A) is a late-stage inhibitor, without early stage inhibition of the  
271 HIV-1 life cycle (13, 14), possibly because the hexameric association of CA proteins in the mature  
272 HIV-1 core requires tight molecular packing, prevent access of CAP-1 to this pocket. Indeed, the other  
273 small molecules, including BD-1 and BM-1 (18), which share the CAP-1 binding region, are all late-  
274 stage inhibitors. Therefore, the inhibitory mechanism of group A is likely different from that of ACAi-  
275 028. PF74 (group B) interacts with a region distinct from ACAi-028 and CAP-1, as shown in Fig. 9  
276 and Table 4, and binds to the pocket formed between CA-NTD and the CA-CTD of an adjacent CA  
277 monomer. PF74 is known to inhibit both the early and late stages of the HIV-1 life cycle (15), whereas  
278 ACAi-028 only inhibited the early stage (Fig. 2 and 3). As shown in the CA multimerization and DSF  
279 assay (Fig. 5), ACAi-028 has a significant effect on the CA multimerization and thermal stability,  
280 which are completely opposite to PF74, suggesting that ACAi-028 and PF74 represent different classes  
281 of CA inhibitors (Fig. 9 and Table 4). I-XW-053 (19) (group C) binds to, and disrupts CA NTD-NTD

282 interactions in CA hexamers during the early stages of HIV-1 infection. By SPR analysis of I-XW-053  
283 binding with CA mutants, the proposed binding sites of I-XW-053 were found to involve I37 and R173,  
284 which the amino acids identified within the target binding region of ACAi-028. Group C includes C1  
285 (20), a late-stage assembly inhibitor that interacts with the CA-NTD residues at E98, H120, and I124  
286 residues. Ebselen (group D) is a covalent inhibitor of HIV-1 CA by forming a selenosulphide bond  
287 with C198 and C218 residues in the CA-CTD. ACAi-028 possesses distinct properties, in comparison  
288 to the inhibitors of groups C and D, suggesting that ACAi-028 targeting the hydrophobic pocket is  
289 likely to be different from any previously discovered CA inhibitors.

290 Amino acid substitutions that alter CA multimerization have been previously reported (38).  
291 Substitution of amino acid residues at S16 and T19 altered the CA multimerization; S16E mutants  
292 decreased the CA multimerization, whereas T19A mutants increased the CA multimerization.  
293 Additionally, E45A substitution, E45 residue is a residue predicted to be located in the ACAi-028-  
294 binding pocket, is known to increase the CA multimerization (45). These amino acids might constitute  
295 an important site for CA dimerization in the formation of CA hexamers (Fig. 8). The binding of ACAi-  
296 028 to the pocket could potentially interfere with CA dimerization, because this pocket is located  
297 within an inward facing portion of the CA hexamer (Fig. 8A), which is supported by the reduction of  
298 CA multimerization in the presence of ACAi-028 (Fig. 5A). To investigate the binding profile of  
299 ACAi-028 to CA-NTD, we produced crystals of CA-NTD<sub>1-146/Δ87-99G</sub> proteins, according to a previous  
300 report (15), and utilized this structure for the preparation of a docking model for ACAi-028 binding to



301 CA. Unfortunately, when crystals of CA-NTD<sub>1-146/Δ87-99G</sub> were produced in the presence of ACAi-028,  
302 significant precipitations occurred without the emergency of a crystal in the droplet, suggesting that  
303 ACAi-028 may cause CA proteins instability or destabilization of the CA protein. Thus, we were  
304 unable to acquire actual binding profiles of ACAi-028 to CA. Moreover, when we have selected HIV-  
305 1 variants resistant to ACAi-028, with increasing concentrations of up to 20 μM, we did not detect  
306 ACAi-028-related strong resistant mutations in the CA (Gag) regions, suggesting that ACAi-028 might  
307 still possess an unknown mechanism for HIV-1 inhibition. This represents a limitation of the present  
308 study, and requires further investigation.

309 Recently, lenacapavir was reported to be a powerful anti-HIV compound, with broad-spectrum  
310 inhibition, even against multidrug-resistant HIV-1, HIV-2, and SIV (21), for long-acting HIV-1  
311 treatment (21, 22) (Phase 2/3 CAPELLA trial). Furthermore, lenacapavir has also been predicted to be  
312 effective in HIV prevention as HIV pre-exposure prophylaxis (PrEP). These findings strongly suggest  
313 that CA is an attractive therapeutic target for the development of novel antivirals.

314 In conclusion, we have identified ACAi-028 as a small molecular anti-HIV-1 CA inhibitor that  
315 targets a novel hydrophobic CA-NTD pocket, exerting the early-stage inhibition of the HIV-1 life  
316 cycle with EC<sub>50</sub> of 0.55 μM. Further research is underway to understand the role of this region in HIV-  
317 1 replication. The novel hydrophobic pocket identified here, should be a viable target for the  
318 development of new synthetic CA inhibitors. Furthermore, ACAi-028, a potent CA inhibitor targeting  
319 this novel pocket, could have valuable therapeutic and research applications.

## 320 **Materials and Methods**

### 321 **Cells and Viruses**

322 MT-2 and MT-4 cells (Japanese Collection of Research Bioresources Cell Bank; JCRB Cell Bank,  
323 Japan) were cultured in RPMI1640 medium (Gibco, Thermo Fisher Scientific, USA) with Fetal Bovine  
324 Serum (FBS, Gibco, Thermo Fisher Scientific, USA), Penicillin (P), and Kanamycin (K). 293T, Li 7,  
325 HLE, and COS7 cells obtained from JCRB Cell bank and TZM-bl cells obtained from the NIH AIDS  
326 Research and Reference Reagent Program were cultured in low glucose DMEM with L-Glutamine and  
327 Phenol Red (Fujifilm Wako Pure Chemical Corporation, Japan), as well as FBS, P, and K. PHA-  
328 PBMCs were derived from a single donor in each independent experiment. The research protocols  
329 described in the present study were carried out in accordance with relevant guidelines and regulations,  
330 and were approved in Ethics Committee for Epidemiological and General Research at the Faculty of  
331 Life Sciences, Kumamoto University. The HIV-1 strains used in our experiments have already been  
332 established previously, including HIV-1<sub>NL4-3</sub>, HIV-1<sub>LAI</sub>, HIV-1<sub>Ba-L</sub>, HIV-1<sub>JR-FL</sub>, HIV-1<sub>ERS104pre</sub> which  
333 was isolated from clinical HIV-1 strains of drug-naïve patients with AIDS (46), and HIV-1<sub>MDR/B</sub> which  
334 was originally isolated from AIDS patient who had received 9 anti-HIV-1 drugs over the 34 months  
335 and was genotypically and phenotypically characterized as multi-drug-resistant HIV-1 variant (47, 48).  
336 HIV-1<sub>VSV-G ΔENV</sub> was produced by co-transfection of pCMV-VSV-G vector (addgene) and pNL4-3<sub>ΔENV</sub>  
337 with deleted Kpn1-Nhe1 site in the Env region into 293T cells.

338

## 339 **Plasmid constructs**

340 Full-length CA sequences derived from pNL<sub>4-3</sub> was introduced to pET30a vectors (Novagen-Merck  
341 KGaA, Germany), producing a pET30a CA vector. The site-directed mutagenesis was performed using  
342 PrimeSTAR<sup>®</sup> Max (Takara Bio Inc. Japan) to introduce S16E, T19A, E45A, and M185A into the  
343 pET30a CA, producing pET30a CA<sub>S16E</sub>, CA<sub>T19A</sub>, and CA<sub>M185A</sub> vectors, respectively. CA-NTD<sub>146</sub>  
344 deletion sequence carrying a single glycine residue instead of CypA-BL (residues 87–99) (the amino  
345 acids sequence is based on (15)) was introduced to pET30a vectors 6xHis at N-terminus, producing a  
346 pET30a His-CA<sub>1-146/Δ87-99G</sub> vector

347

## 348 **Protein expression and purification**

349 CA proteins were produced from the pET30aCA in *E. coli* Rosetta<sup>™</sup> (DE3) pLysS Competent Cells  
350 (Novagen) grown in LB medium supplemented with Kanamycin and chloramphenicol at 37°C, and  
351 induced with 1.0 mM Isopropyl β-D-1-thiogalactopyranoside (IPTG) for 3-5 hr at 37°C. The bacterial  
352 cells were harvested and stored at -80°C. The pellets of CA were resuspended and sonicated in CA  
353 buffer (50 mM Tris-HCl pH 7.5, 150 mM NaCl, 5 mM 2-mercaptoethanol (BME)) supplemented with  
354 0.5 mM phenylmethylsulfonylfluoride. The lysates were cleared by centrifugation for 15 min at 3,500  
355 rpm at 4°C. After 5M NaCl was added to the supernatants, the samples were cleared by centrifugation  
356 for 15 min at 3,500 rpm again. The precipitate was resuspended in the CA buffer. The sample was  
357 precleared for 15 min at 15,000 rpm at 4°C, and the supernatants were filtered through a 0.45 μm filter.

358 The CA proteins were loaded onto a HiLoad 16/60 Superdex 200 column (GE Healthcare, USA), and  
359 were eluted with CA loading buffer (20 mM Tris-HCl pH 7.5, 150 mM NaCl, 5 mM BME) using  
360 AKTAprime plus (GE Healthcare). CA monomer fractions were concentrated using Amicon Ultra-  
361 10K device (Merck Millipore) in the CA buffer. The proteins concentration was determined using a  
362 BCA Protein Assay Reagent Kit (Thermo Fisher Scientific) and stored at -80°C.

363

### 364 ***In silico* simulation and docking model**

365 The crystal structures of CA-NTD<sub>1-146/Δ87-99G</sub> produced by our method and various full-length CA  
366 proteins ([PDB] accession number 4XFX, 3H4E, and 5MCX) from the RCSB Protein Data Bank  
367 (<http://www.rcsb.org>) are utilized for the docking simulation. Hydrogens were added to 2D structure  
368 of ACAi-028, and the structures were energy-minimized with the MMFF94x force field as  
369 implemented in MOE (Chemical Computing Group, Quebec, Canada). All docking simulations were  
370 performed with SeeSAR and FlexX version 10 (BioSolveIT GmbH, Sankt Augustin, Germany).  
371 Molecular graphics and analysis were performed with UCSF Chimera  
372 (<https://www.rbvi.ucsf.edu/chimera>).

373

### 374 **Fusion assay**

375 Fusion assay was performed previously (31). In brief, 293T cells were transfected with pHIV-1<sub>NL4-3</sub>  
376 Tat with or without pHIV-1<sub>NL4-3</sub> Env while COS-7 cells were transfected with CD4, CXCR4, and LTR-

377 Luciferase. After 24 hr of incubation at 37°C and 5% CO<sub>2</sub>, the transfected 293T cells were mixed with  
378 the transfected COS-7 cells in the presence or absence of tested compounds for 6 hr. The luciferase of  
379 the samples was detected using Firefly Luciferase Reporter Assay Kit I (PromoCell GmbH, Germany)  
380 and the luciferase intensity was normalized to the negative control. Ratios of luciferase intensity of the  
381 samples were compared.

382

### 383 **Time-of-addition assay**

384 Time-of addition assay is previously reported (32). Briefly, TZM-bl cells ( $5 \times 10^4$ /mL) were subjected  
385 to HIV-1<sub>LAI</sub> (50 ng/mL of p24) in 96-well white plates. Drugs at the indicated concentrations were also  
386 added to the set of wells demarcated for 0 hr. After 2 hr of incubation at 37°C and 5% CO<sub>2</sub>, The  
387 supernatant was removed and the cells were washed once to remove all traces of the virus. Drugs at  
388 the respective concentration were added back to the cells marked for 0 hr as well as the ones marked  
389 for 2 hr. Subsequently, every 2 hr after, drugs at the correct concentration was added to the next each  
390 well until 10 h after incubation. The cells were incubated at 37°C and 5% CO<sub>2</sub> until 48 hr. Luciferase  
391 intensity was measured using FluoSTAR Omega (BMG labtech GmbH, Germany).

392

### 393 **TZM-bl assay**

394 TZM-bl cells were obtained from the NIH AIDS Research and Reference Reagent Program. TZM-bl  
395 assay was performed in 96-well white plate using the Firefly Luciferase Reporter Assay Kit I. Briefly,

396 the supernatant medium was removed and lysis buffer added to the samples. After the samples were  
397 shaken for 25 minutes, D-luciferin was added to each well. After shaking, the luciferase intensity was  
398 measured using FluoSTAR Omega.

399

## 400 **Virus quantification**

401 Virus samples were measured by an HIV-1 p24 enzyme-linked immunosorbent assay (ELISA) using  
402 Lumipulse G1200 (Fujirebio Inc, Japan), and normalized to determine the viral concentration.

403

## 404 **Reverse Transcriptase Assay**

405 Colorimetric reverse transcriptase assay was performed (Reverse Transcriptase Assay colorimetric,  
406 Roche, Switzerland). Briefly, recombinant HIV-1 reverse transcriptase was added to tested compounds  
407 dissolved in the lysis buffer and subsequently incubated at 37°C and 5% CO<sub>2</sub> for 3-4 hr. After washing,  
408 peroxidase-conjugated anti-digoxigenin antibody solution were added to the samples and incubated  
409 for 1 hr at 37°C and 5% CO<sub>2</sub>. After washing, peroxidase substrate ABTS solution with enhancer was  
410 added to the samples. The optical density was measured at 405 nm using a Versamax microplate reader  
411 (Molecular Devices, USA).

412

## 413 **Western blotting**

414 Western blotting was described previously (40). Briefly 293T cells were plated and incubated for 24

415 hr at 37°C in 5% CO<sub>2</sub>. Cells were transfected with pNL<sub>4-3</sub> vectors using Attractene Transfection  
416 Reagent (QIAGEN, Germany). After 8 hr, the medium was changed and the tested compounds were  
417 added, and then incubated for 48 hr. Subsequently, the viruses were filtered, purified by  
418 ultracentrifugation in 15% sucrose–phosphate-buffered saline (PBS), normalized by the p24 levels,  
419 and stored in PBS at -80°C. The cells were lysed in M-per buffer (Thermo Fisher Scientific)  
420 supplemented with Halt Protease Inhibitor Cocktail (Thermo Fisher Scientific). The samples were  
421 titrated using BCA Protein Assay Kit and stored at -80°C. The samples were prepared and separated  
422 with SDS-PAGE (5-20% Extra PAGE One Precast Gel; nacalai tesque) and transferred onto a  
423 nitrocellulose membrane. The samples were detected with anti-HIV-1 Gag (p55 + p24 + p17) antibody  
424 (catalog number ab63917; Abcam), anti-HIV-1 IN antibody (catalog number ab66645; Abcam),  
425 second mouse or rabbit antibody (MBL co., LTD.), and anti-beta actin antibody (HRP conjugated)  
426 (Abcam), and then visualized using SuperSignal WestPico Chemiluminescent Substrates (Thermo  
427 Fisher Scientific).

428

## 429 **CA multimerization assay**

430 CA multimerisation assays were performed as previously reported (38). Compound was added to 30  
431 µM of CA protein in 50 mM phosphate buffer at pH 8.0 supplemented with 50mM NaCl. Capsid  
432 assembly was initiated by addition of 50 mM sodium phosphate at pH 8.0 supplemented with 5M  
433 NaCl. Optical density at 350 nm was measured using FLUOstar Omega (BMG labtech) for 1 hr.

434

## 435 **DSF**

436 DSF method was previously described (39, 40). In brief, recombinant CA proteins (25  $\mu$ M) were  
437 prepared in PBS. After CA treatment with tested compounds for 5-8 hr on RT, SYPRO Orange (Life  
438 Technologies) was added to the samples (final concentration of SYPRO orange: 5 $\times$ ). The samples  
439 were successively heated from 25 to 95°C, and the increasing fluorescence intensities were measured  
440 by the real-time PCR system 7500 Fast (Applied Biosystems, Thermo Fisher Scientific). Data  
441 indicated is as a relative ratio between minimum and maximum intensity of SYPRO orange from 25  
442 to 95°C detected for each sample.

443

## 444 **ESI-MS**

445 ESI-MS protocol was previously described (37). In brief, MS spectra of CA in the presence of ACAi-  
446 028 were obtained using an electrospray ionization (ESI) quadrupole time-of-flight (QTOF) mass  
447 spectrometer (impact II, Bruker Daltonics). Each sample solution in native condition was introduced  
448 to the ESI-QTOF mass spectrometer through an infusion pump at a flow rate of 3.3  $\mu$ L/min. To detect  
449 the denatured samples, analysis was done using the QTOF mass spectrometer equipped with a Captive  
450 Spray electrospray ionization platform with liquid chromatography (Ultimate 3000 HPLC, Thermo  
451 Fisher scientific). The following ion source parameters have been applied: dry Heater: 150°C, dry Gas:  
452 8.0 L/min, capillary voltage: 1000 V, End plate offset: -500 V. MS scans have been acquired at a



453 spectra rate of 1 Hz at a mass range from 100 to 3000 m/z. Molecular weights by protein deconvolution  
454 were determined using Data Analysis 4.4 (Bruker Daltonics). M.W. of CA proteins was calculated  
455 using Peptide Mass Calculator v3.2 (<http://rna.rega.kuleuven.be/masspec/pepcalc.htm>)

456

## 457 **Crystallization and X-ray data collection**

458 The crystallization procedure was performed according to methods in a previous report (15) ([PDB]  
459 2XDE). Briefly, crystallization was performed by the hanging-drop vapor diffusion method using  
460 EasyXtal 15-well tools (QIAGEN). CA-NTD<sub>1-146/Δ87-99G</sub> proteins were expressed and purified as  
461 described above. The protein concentration was adjusted to 2 mg/ml. The reservoir solution consists  
462 of 100 mM phosphate-citrate pH 4.2, 200 mM NaCl, and 20% PEG 8000. The crystals reached 0.2 to  
463 0.4 mm within 1 week at 10°C. The crystals were transferred to a reservoir solution supplemented with  
464 25% glycerol and flash-frozen at 100 K. Then, X-ray diffraction experiments were carried out. Data  
465 collection and refinement statistics were subsequently examined.

466

## 467 **Drug Susceptibility Assay**

468 The susceptibility of HIV-1<sub>LAI</sub> and HIV-2<sub>ROD</sub> to ACAi-028 and control drugs/compounds were  
469 determined as previously described (49). Briefly, MT-2 cells (10<sup>4</sup>/ml) were exposed to 100 × 50 %  
470 tissue culture infectious dose (TCID<sub>50</sub>) of HIV-1<sub>LAI</sub> or HIV-2<sub>ROD</sub> in the presence or absence of various

471 concentrations of compounds in 96-well plates and were incubated at 37°C for 7 days. After incubation,  
472 100 µl of the medium was removed from each well, 3-(4,5-dimethylthiazol-2-yl)-2,5-  
473 diphenyltetrazolium bromide (MTT) solution was added to each well in the plate, followed by  
474 incubation at 37°C for 1.5-4 hr. After incubation to dissolve the formazan crystals, acidified  
475 isopropanol containing 4% (v/v) Triton X-100 was added to each well and the optical density measured  
476 in a kinetic microplate reader (Vmax; Molecular Devices, Sunnyvale, CA). All assays were performed  
477 in duplicate. 50% cytotoxic concentration (CC<sub>50</sub>) of compounds/drugs for each cell line was also  
478 evaluated by MTT assay. To determine the sensitivity of primary HIV-1 isolates to compounds, PHA-  
479 PBMC (10<sup>6</sup>/ml) were exposed to 50 TCID<sub>50</sub> of each primary HIV-1 isolate and cultured in the presence  
480 or absence of various concentrations of drugs in 10-fold serial dilutions in 96-well plates. In  
481 determining the drug susceptibility of certain laboratory HIV-1 strains, MT-4 cells were employed as  
482 target cells as previously described (50, 51) with minor modifications. In brief, MT-4 cells (10<sup>5</sup>/ml)  
483 were exposed to 100 TCID<sub>50</sub> of drug-resistant HIV-1 strains in the presence or absence of various  
484 concentrations of compounds and were incubated at 37°C. On day 7 of culture, the supernatants were  
485 harvested and the amounts of p24 (CA) protein were determined by using Lumipulse G1200. Drug  
486 concentrations that suppressed the production of p24 Gag protein by 50% (EC<sub>50</sub>; 50% effective  
487 concentration) were determined by comparison with the p24 production level in drug-free control cell  
488 culture. PHA-PBMCs were derived from a single donor in each independent experiment.

489

## 490 **Compounds**

491 ACAi-028 was purchased from ChemBridge (San Diego, CA, USA). AZT, PF74, and EFV were  
492 purchased from Sigma-Aldrich, Ebselen from AdipoGen Life Sciences, and AMD3100 from Selleck  
493 Chemicals. Atazanavir (ATV) was kindly provided by Bristol Myers Squibb (New York, NY).

494

## 495 **Acknowledgements**

496 We thank Teruya Nakamura for crystal determination and Sachiko Otsu for technical assistance of  
497 the experiments. We also thank the beamline staff at Photon Factory and SPring-8 for their help in the  
498 data collection.

499 This work was supported by Japan Society for the Promotion of Science KAKENHI Grant Numbers  
500 JP18K08436 (HN) and JP15K09574 (MA). Development of Novel Drugs for Treating HIV-1 Infection  
501 and AIDS, and the grants from the Sumitomo Electric Group CSR Foundation (MA).

502 TN and MA designed and TC, TN, NT, and MA performed all the experiments. NT and MM discussed  
503 the data and supported preparation of the MS. MA and HN supervised, managed the project, and  
504 acquired the necessary funding. TC, TN, and MA wrote and MM and HN edited the MS. All authors  
505 read, commented on, and approved the final manuscript.

506 We declare that we have no conflicts of interest.

507

## 508 **Reference**

- 509 1. May MT, Gompels M, Delpech V, Porter K, Orkin C, Kegg S, Hay P, Johnson M, Palfreeman  
510 A, Gilson R, Chadwick D, Martin F, Hill T, Walsh J, Post F, Fisher M, Ainsworth J, Jose S,  
511 Leen C, Nelson M, Anderson J, Sabin C, Babiker A, Dunn D, Gazzard B, Phillips A, Pillay D,  
512 Sachikonye M, Schwenk A, Winston A, Mackie N, Huntington S, Thornton A, Glabay A.  
513 2014. Impact on life expectancy of HIV-1 positive individuals of CD4R cell count and viral  
514 load response to antiretroviral therapy. *Aids* 28:1193–1202.
- 515 2. Trickey A, May MT, Vehreschild JJ, Obel N, Gill MJ, Crane HM, Boesecke C, Patterson S,  
516 Grabar S, Cazanave C, Cavassini M, Shepherd L, Monforte A d. A, van Sighem A, Saag M,  
517 Lampe F, Hernando V, Montero M, Zangerle R, Justice AC, Sterling T, Ingle SM, Sterne  
518 JAC. 2017. Survival of HIV-positive patients starting antiretroviral therapy between 1996 and  
519 2013: a collaborative analysis of cohort studies. *Lancet HIV* 4:e349–e356.
- 520 3. Günthard HF, Calvez V, Paredes R, Pillay D, Shafer RW, Wensing AM, Jacobsen DM,  
521 Richman DD. 2019. Human Immunodeficiency Virus Drug Resistance: 2018  
522 Recommendations of the International Antiviral Society-USA Panel. *Clin Infect Dis* 68:177–  
523 187.
- 524 4. Kanters S, Park JJH, Chan K, Socias ME, Ford N, Forrest JI, Thorlund K, Nachega JB, Mills  
525 EJ. 2017. Interventions to improve adherence to antiretroviral therapy: a systematic review  
526 and network meta-analysis. *Lancet HIV* 4:e31–e40.

- 527 5. Rawle DJ, Harrich D. 2018. Toward the “ unravelling ” of HIV : Host cell factors involved in  
528 HIV-1 core uncoating Introduction to HIV-1 uncoating : Down the rabbit hole. PLoS Pathog  
529 14:e1007270.
- 530 6. Arhel N. 2010. Revisiting HIV-1 uncoating 25–28.
- 531 7. Campbell EM, Hope TJ. 2015. HIV-1 capsid: The multifaceted key player in HIV-1 infection.  
532 Nat Rev Microbiol 13:471–483.
- 533 8. Mamede JI, Cianci GC, Anderson MR, Hope TJ. 2017. Early cytoplasmic uncoating is  
534 associated with infectivity of HIV-1. Proc Natl Acad Sci U S A 114:E7169–E7178.
- 535 9. Arhel NJ, Souquere-Besse S, Munier S, Souque P, Guadagnini S, Rutherford S, Prévost MC,  
536 Allen TD, Charneau P. 2007. HIV-1 DNA Flap formation promotes uncoating of the pre-  
537 integration complex at the nuclear pore. EMBO J 26:3025–3037.
- 538 10. Dharan A, Bachmann N, Talley S, Zwickelmaier V, Campbell EM. 2020. Nuclear pore  
539 blockade reveals that HIV-1 completes reverse transcription and uncoating in the nucleus. Nat  
540 Microbiol 5:1088–1095.
- 541 11. Burdick RC, Li C, Munshi MH, Rawson JMO, Nagashima K, Hu WS, Pathak VK. 2020.  
542 HIV-1 uncoats in the nucleus near sites of integration. Proc Natl Acad Sci U S A 117:5486–  
543 5493.

- 544 12. Selyutina A, Persaud M, Lee K, KewalRamani V, Diaz-Griffero F. 2020. Nuclear Import of  
545 the HIV-1 Core Precedes Reverse Transcription and Uncoating. *Cell Rep* 32:108201.
- 546 13. Tang C, Loeliger E, Kinde I, Kyere S, Mayo K, Barklis E, Sun Y, Huang M, Summers MF.  
547 2003. Antiviral Inhibition of the HIV-1 capsid protein. *J Mol Biol* 327:1013–1020.
- 548 14. Kelly BN, Kyere S, Kinde I, Tang C, Howard BR, Robinson H, Sundquist WI, Summers MF,  
549 Hill CP. 2007. Structure of the Antiviral Assembly Inhibitor CAP-1 Complex with the HIV-1  
550 CA Protein. *J Mol Biol* 373:355–366.
- 551 15. Blair WS, Pickford C, Irving SL, Brown DG, Anderson M, Bazin R, Cao J, Ciaramella G,  
552 Isaacson J, Jackson L, Hunt R, Kjerrstrom A, Nieman JA, Patick AK, Perros M, Scott AD,  
553 Whitby K, Wu H, Butler SL. 2010. HIV Capsid is a Tractable Target for Small Molecule  
554 Therapeutic Intervention. *PLoS Pathog* 6:e1001220.
- 555 16. Price AJ, Jacques DA, McEwan WA, Fletcher AJ, Essig S, Chin JW, Halambage UD, Aiken  
556 C, James LC. 2014. Host Cofactors and Pharmacologic Ligands Share an Essential Interface  
557 in HIV-1 Capsid That Is Lost upon Disassembly. *PLoS Pathog* 10:e1004459.
- 558 17. Thenin-Houssier S, De Vera IMS, Pedro-Rosa L, Brady A, Richard A, Konnick B, Opp S,  
559 Buffone C, Fuhrmann J, Kota S, Billack B, Pietka-Ottlik M, Tellinghuisen T, Choe H, Spicer  
560 T, Scampavia L, Diaz-Griffero F, Kojetin DJ, Valentea ST. 2016. Ebselen, a small-molecule  
561 capsid inhibitor of HIV-1 replication. *Antimicrob Agents Chemother* 60:2195–2208.

- 562 18. Lemke CT, Titolo S, Goudreau N, Faucher AM, Mason SW, Bonneau P. 2013. A novel  
563 inhibitor-binding site on the HIV-1 capsid N-terminal domain leads to improved  
564 crystallization via compound-mediated dimerization. *Acta Crystallogr Sect D Biol Crystallogr*  
565 69:1115–1123.
- 566 19. Kortagere S, Madani N, Mankowski MK, Schön A, Zentner I, Swaminathan G, Princiotto A,  
567 Anthony K, Oza A, Sierra L-J, Passic SR, Wang X, Jones DM, Stavale E, Krebs FC, Martín-  
568 García J, Freire E, Ptak RG, Sodroski J, Cocklin S, Smith AB. 2012. Inhibiting Early-Stage  
569 Events in HIV-1 Replication by Small-Molecule Targeting of the HIV-1 Capsid. *J Virol*  
570 86:8472–8481.
- 571 20. Goudreau N, Lemke CT, Faucher AM, Grand-Maître C, Goulet S, Lacoste JE, Rancourt J,  
572 Malenfant E, Mercier JF, Titolo S, Mason SW. 2013. Novel inhibitor binding site discovery  
573 on HIV-1 capsid N-terminal domain by NMR and X-ray crystallography. *ACS Chem Biol*  
574 8:1074–1082.
- 575 21. Yant SR, Mulato A, Hansen D, Tse WC, Niedziela-Majka A, Zhang JR, Stepan GJ, Jin D,  
576 Wong MH, Perreira JM, Singer E, Papalia GA, Hu EY, Zheng J, Lu B, Schroeder SD, Chou  
577 K, Ahmadyar S, Liclican A, Yu H, Novikov N, Paoli E, Gonik D, Ram RR, Hung M,  
578 McDougall WM, Brass AL, Sundquist WI, Cihlar T, Link JO. 2019. A highly potent long-  
579 acting small-molecule HIV-1 capsid inhibitor with efficacy in a humanized mouse model. *Nat*  
580 *Med* 25:1377–1384.

- 581 22. Link JO, Rhee MS, Tse WC, Zheng J, Somoza JR, Rowe W, Begley R, Chiu A, Mulato A,  
582 Hansen D, Singer E, Tsai LK, Bam RA, Chou CH, Canales E, Brizgys G, Zhang JR, Li J,  
583 Graupe M, Morganelli P, Liu Q, Wu Q, Halcomb RL, Saito RD, Schroeder SD, Lazerwith SE,  
584 Bondy S, Jin D, Hung M, Novikov N, Liu X, Villaseñor AG, Cannizzaro CE, Hu EY,  
585 Anderson RL, Appleby TC, Lu B, Mwangi J, Liclican A, Niedziela-Majka A, Papalia GA,  
586 Wong MH, Leavitt SA, Xu Y, Koditek D, Stepan GJ, Yu H, Pagratis N, Clancy S, Ahmadyar  
587 S, Cai TZ, Sellers S, Wolckenhauer SA, Ling J, Callebaut C, Margot N, Ram RR, Liu YP,  
588 Hyland R, Sinclair GI, Ruane PJ, Crofoot GE, McDonald CK, Brainard DM, Lad L,  
589 Swaminathan S, Sundquist WI, Sakowicz R, Chester AE, Lee WE, Daar ES, Yant SR, Cihlar  
590 T. 2020. Clinical targeting of HIV capsid protein with a long-acting small molecule. *Nature*  
591 584:614–618.
- 592 23. Bester SM, Wei G, Zhao H, Adu-Ampratwum D, Iqbal N, Courouble V V., Francis AC,  
593 Annamalai AS, Singh PK, Shkriabai N, van Blerkom P, Morrison J, Poeschla EM, Engelman  
594 AN, Melikyan GB, Griffin PR, Fuchs JR, Asturias FJ, Kvaratskhelia M. 2020. Structural and  
595 mechanistic bases for a potent HIV-1 capsid inhibitor. *Science* (80- ) 370:360–364.
- 596 24. Amano M, Bulut H, Tamiya S, Nakamura T, Koh Y, Mitsuya H. 2019. Amino-acid inserts of  
597 HIV-1 capsid (CA) induce CA degradation and abrogate viral infectivity: Insights for the  
598 dynamics and mechanisms of HIV-1 CA decomposition. *Sci Rep* 9:1–17.



- 599 25. Gitti RK, Lee BM, Walker J, Summers MF, Yoo S, Sundquist WI. 1996. Structure of the  
600 amino-terminal core domain of the HIV-1 capsid protein. *Science* (80- ) 273:231–235.
- 601 26. Gamble TR, Yoo S, Vajdos FF, Von Schwedler UK, Worthylake DK, Wang H, McCutcheon  
602 JP, Sundquist WI, Hill CP. 1997. Structure of the carboxyl-terminal dimerization domain of  
603 the HIV-1 capsid protein. *Science* (80- ) 278:849–853.
- 604 27. Berthet-Colominas C, Monaco S, Novelli A, Sibaï G, Mallet F, Cusack S. 1999. Head-to-tail  
605 dimers and interdomain flexibility revealed by the crystal structure of HIV-1 capsid protein  
606 (p24) complexed with a monoclonal antibody Fab. *EMBO J* 18:1124–1136.
- 607 28. Gres AT, Kirby KA, KewalRamani VN, Tanner JJ, Pornillos O, Sarafianos SG. 2015. X-ray  
608 crystal structures of native HIV-1 capsid protein reveal conformational variability. *Science*  
609 (80- ) 349:99–103.
- 610 29. Mitsuya H, Weinhold KJ, Furman PA, St Clair MH, Lehrman SN, Gallo RC, Bolognesi D,  
611 Barry DW, Broder S. 1985. 3'-Azido-3'-deoxythymidine (BW A509U): An antiviral agent  
612 that inhibits the infectivity and cytopathic effect of human T-lymphotropic virus type  
613 III/lymphadenopathy-associated virus in vitro. *Proc Natl Acad Sci U S A* 82:7096–7100.
- 614 30. Amano M, Miguel Salcedo-Gómez P, Yedidi RS, Delino NS, Nakata H, Venkateswara Rao K,  
615 Ghosh AK, Mitsuya H. 2017. GRL-09510, a Unique P2-Crown-Tetrahydrofuranylurethane -

- 616           Containing HIV-1 Protease Inhibitor, Maintains Its Favorable Antiviral Activity against  
617           Highly-Drug-Resistant HIV-1 Variants in vitro. *Sci Rep* 7(1):12235.
- 618   31.   Maeda K, Das D, Yin PD, Tsuchiya K, Ogata-Aoki H, Nakata H, Norman RB, Hackney LA,  
619           Takaoka Y, Mitsuya H. 2008. Involvement of the Second Extracellular Loop and  
620           Transmembrane Residues of CCR5 in Inhibitor Binding and HIV-1 Fusion: Insights into the  
621           Mechanism of Allosteric Inhibition. *J Mol Biol* 381:956–974.
- 622   32.   Mattei S, Glass B, Hagen WJH, Kräusslich HG, Briggs JAG. 2016. The structure and  
623           flexibility of conical HIV-1 capsids determined within intact virions. *Science* (80- ) 354:1434–  
624           1437.
- 625   33.   Donzella GA, Schols D, Lin SW, Esté JA, Nagashima KA, Maddon PJ, Allaway GP, Sakmar  
626           TP, Henson G, De Clercq E, Moore JP. 1998. AMD3100, a small molecule inhibitor of HIV-1  
627           entry via the CXCR4 co- receptor. *Nat Med* 4:72–77.
- 628   34.   Young SD, Britcher SF, Tran LO, Payne LS, Lumma WC, Lyle TA, Huff JR, Anderson PS,  
629           Olsen DB, Carroll SS, Pettibone DJ, O'brien JA, Ball RG, Balani SK, Lin JH, Chen I-W,  
630           Schleif WA, Sardana V V, Long WJ, Byrnes VW, Emini EA. 1995. L-743,726 (DMP-266): a  
631           Novel, Highly Potent Nonnucleoside Inhibitor of the Human Immunodeficiency Virus Type 1  
632           Reverse Transcriptase. *Antimicrob Agents Chemother* 39:2602-2605.

- 633 35. Koh Y, Nakata H, Maeda K, Ogata H, Bilcer G, Devasamudram T, Kincaid JF, Boross P,  
634 Wang Y-F, Tie Y, Volarath P, Gaddis L, Harrison RW, Weber IT, Ghosh AK, Mitsuya H.  
635 2003. Novel bis-Tetrahydrofuranylurethane-Containing Nonpeptidic Protease Inhibitor (PI)  
636 UIC-94017 (TMC114) with Potent Activity against Multi-PI-Resistant Human  
637 Immunodeficiency Virus In Vitro. *Antimicrob Agents Chemother* 47:3123–3129.
- 638 36. Price AJ, Marzetta F, Lammers M, Ylinen LMJ, Schaller T, Wilson SJ, Towers GJ, James LC.  
639 2009. Active site remodeling switches HIV specificity of antiretroviral TRIMCyp. *Nat Struct*  
640 *Mol Biol* 16:1036–1042.
- 641 37. Hayashi H, Takamune N, Nirasawa T, Aoki M, Morishita Y, Das D, Koh Y, Ghosh AK,  
642 Misumi S, Mitsuya H. 2014. Dimerization of HIV-1 protease occurs through two steps  
643 relating to the mechanism of protease dimerization inhibition by darunavir. *Proc Natl Acad*  
644 *Sci U S A* 111:12234–12239.
- 645 38. Lanman J, Sexton J, Sakalian M, Prevelige, PE. 2002. Kinetic Analysis of the Role of  
646 Intersubunit Interactions in Human Immunodeficiency Virus Type 1 Capsid Protein Assembly  
647 In Vitro. *J Virol* 76:6900–6908.
- 648 39. Niesen FH, Berglund H, Vedadi M. 2007. The use of differential scanning fluorimetry to  
649 detect ligand interactions that promote protein stability. *Nat Protoc* 2:2212–2221.

- 650 40. Nakamura T, Nakamura T, Amano M, Miyakawa T, Yamagata Y, Matsuoka M, Nakata H.  
651 2020. A Conformational Escape Reaction of HIV-1 against an Allosteric Integrase Inhibitor. *J*  
652 *Virol* 94:e00486-20.
- 653 41. Pornillos O, Ganser-Pornillos BK, Kelly BN, Hua Y, Whitby FG, Stout CD, Sundquist WI,  
654 Hill CP, Yeager M. 2009. X-Ray Structures of the Hexameric Building Block of the HIV  
655 Capsid. *Cell* 137:1282–1292.
- 656 42. Chaillon A, Gianella S, Dellicour S, Rawlings SA, Schlub TE, de Oliveira MF, Ignacio C,  
657 Porrachia M, Vrancken B, Smith DM. 2020. HIV persists throughout deep tissues with  
658 repopulation from multiple anatomical sources. *J Clin Invest* 130:1699–1712.
- 659 43. Thenin-Houssier S, T. Valente S. 2016. HIV-1 Capsid Inhibitors as Antiretroviral Agents.  
660 *Curr HIV Res* 14:270–282.
- 661 44. Forshey BM, von Schwedler U, Sundquist WI, Aiken C. 2002. Formation of a Human  
662 Immunodeficiency Virus Type 1 Core of Optimal Stability Is Crucial for Viral Replication. *J*  
663 *Virol* 76:5667–5677.
- 664 45. Douglas CC, Thomas D, Lanman J, Prevelige PE. 2004. Investigation of N-terminal domain  
665 charged residues on the assembly and stability of HIV-1 CA. *Biochemistry* 43:10435–10441.
- 666 46. Shirasaka T, Kavlick MF, Ueno T, Gao WY, Kojima E, Alcaide ML, Choekijchai S, Roy  
667 BM, Arnold E, Yarchoan R, Mitsuya H. 1995. Emergence of human immunodeficiency virus

- 668 type 1 variants with resistance to multiple dideoxynucleosides in patients receiving therapy  
669 with dideoxynucleosides. *Proc Natl Acad Sci U S A* 92:2398–2402.
- 670 47. Yoshimura K, Kato R, Kavlick MF, Nguyen A, Maroun V, Maeda K, Hussain KA, Ghosh  
671 AK, Gulnik S V., Erickson JW, Mitsuya H. 2002. A Potent Human Immunodeficiency Virus  
672 Type 1 Protease Inhibitor, UIC-94003 (TMC-126), and Selection of a Novel (A28S) Mutation  
673 in the Protease Active Site. *J Virol* 76:1349–1358.
- 674 48. Yoshimura K, Kato R, Yusa K, Kavlick MF, Maroun V, Nguyen A, Mimoto T, Ueno T,  
675 Shintani M, Falloon J, Masur H, Hayashi H, Erickson J, Mitsuya H. 1999. JE-2147: A  
676 dipeptide protease inhibitor (PI) that potently inhibits multi-PI-resistant HIV-1. *Proc Natl*  
677 *Acad Sci U S A* 96:8675–8680.
- 678 49. Amano M, Salcedo-Gómez PM, Yedidi RS, Zhao R, Hayashi H, Hasegawa K, Nakamura T,  
679 Martyr CD, Ghosh AK, Mitsuya H. 2019. Novel central nervous system (CNS)-targeting  
680 protease inhibitors for drug-resistant HIV infection and HIV-associated CNS complications.  
681 *Antimicrob Agents Chemother* 63:466–485.
- 682 50. Amano M, Salcedo-Gómez PM, Zhao R, Yedidi RS, Das D, Bulut H, Delino NS, Sheri VR,  
683 Ghosh AK, Mitsuya H. 2016. A modified P1 moiety enhances in vitro antiviral activity  
684 against various multidrug-resistant HIV-1 variants and in vitro central nervous system  
685 penetration properties of a novel nonpeptidic protease inhibitor, GRL-10413. *Antimicrob*  
686 *Agents Chemother* 60:7046–7059.

- 687 51. Amano M, Koh Y, Das D, Li J, Leschenko S, Wang YF, Boross PI, Weber IT, Ghosh AK,  
 688 Mitsuya H. 2007. A novel bis-tetrahydrofuranylurethane-containing nonpeptidic protease  
 689 inhibitor (PI), GRL-98065, is potent against multiple-PI-resistant human immunodeficiency  
 690 virus in vitro. *Antimicrob Agents Chemother* 51:2143–2155.
- 691 52. Waterhouse AM, Procter JB, Martin DMA, Clamp M, Barton GJ. 2009. Sequence analysis  
 692 Jalview Version 2-a multiple sequence alignment editor and analysis workbench. *Bioinforma*  
 693 *Appl NOTE* 25:1189–1191.

694

## 695 Table

696 **Table 1: Comparison of anti-HIV-1 activity of ACAi-028 against other inhibitors.**

| Drugs    | EC <sub>50</sub> (μM)                |                                        |                      |                      |
|----------|--------------------------------------|----------------------------------------|----------------------|----------------------|
|          | Single round inhibition <sup>a</sup> | Multiple round inhibition <sup>b</sup> |                      |                      |
|          | TZM-bl                               | MT-4                                   | MT-2                 |                      |
|          | HIV-1 <sub>VSVG-NL4-3</sub>          | HIV-1 <sub>NL4-3</sub>                 | HIV-1 <sub>LAI</sub> | HIV-2 <sub>ROD</sub> |
| ACAi-028 | 0.48 ± 0.21                          | 0.12 ± 0.04                            | 0.55 ± 0.04          | >10                  |
| PF74     | 0.76 ± 0.55                          | 0.33 ± 0.08                            | 0.37 ± 0.50          | >10                  |
| Ebselen  | 1.68 ± 1.45                          | 1.83 ± 0.10                            | 1.73 ± 0.04          | n.d.                 |
| AZT      | 0.14 ± 0.13                          | 0.26 ± 0.02                            | 0.23 ± 0.05          | n.d.                 |

697 <sup>a</sup> TZM-bl cells (5×10<sup>4</sup>/mL) were subjected to HIV-1<sub>VSVG-NL4-3</sub> (50 ng/mL of p24) in 96-well plates for 48 h in the  
 698 presence of the tested compounds. The supernatant was removed and lysis buffer added to the samples. After the  
 699 samples were shaken for 25 minutes, D-luciferin was added to each well. The luciferase intensity was measured using  
 700 FluoSTAR Omega.ssay at 48 h. <sup>b</sup> MT-2 cells (10<sup>4</sup>/ml) were exposed to 100 TCID<sub>50</sub> of HIV-1<sub>LAI</sub> or HIV-2<sub>ROD</sub> and  
 701 cultured in the presence of various concentrations of each compound, and the EC<sub>50</sub> (50% effective concentration)  
 702 values were determined by the MTT assay. For HIV-1<sub>NL4-3</sub>, the EC<sub>50</sub> values were determined by using MT-4 cells as  
 703 target cells. MT-4 cells (10<sup>5</sup>/ml) were exposed to 100 TCID<sub>50</sub>s of HIV-1<sub>NL4-3</sub>, and the inhibition of p24 Gag protein  
 704 production by each drug was used as an endpoint. All assays were conducted in duplicate, and the data shown  
 705 represent mean values (± 1 S.D.) derived from the results of two or three independent experiments.

706

707 **Table 2: Anti-HIV-1 activity of ACAi-028 against clinically isolated multi-drug-resistant HIV-1**  
 708 **in PBMC and protease-inhibitor-resistant laboratory strain in MT-4 cells.**

| Drugs    | EC <sub>50</sub> (μM)      |                        |                                     |
|----------|----------------------------|------------------------|-------------------------------------|
|          | PBMC                       |                        | MT-4                                |
|          | HIV-1 <sub>ERS104pre</sub> | HIV-1 <sub>MDR/B</sub> | HIV-1 <sub>ATV<sup>R</sup>5μM</sub> |
| ACAi-028 | 0.32 ± 0.07                | 0.36 ± 0.05            | 0.64 ± 0.09                         |
| PF74     | 0.29 ± 0.03                | 0.33 ± 0.02            | 0.63 ± 0.07                         |
| ATV      | 0.0026 ± 0.0002            | 0.45 ± 0.01            | >1                                  |

709 PHA-PBMC (10<sup>6</sup>/ml) or MT-4 cells (10<sup>5</sup>/ml) were exposed to 100 TCID<sub>50</sub> of each virus, and the inhibition of p24  
 710 Gag protein production by each compound was used as an endpoint. All assays were conducted in duplicate, and the  
 711 data shown represent mean values (± 1 S.D.) derived from the results of two independent experiments. PHA-PBMCs  
 712 were derived from a single donor in each independent experiment. HIV-1<sub>ERS104pre</sub> was isolated from treatment-naïve  
 713 patient and served as wild-type HIV-1. HIV-1<sub>MDR/B</sub> was originally isolated from AIDS patient who had received 9  
 714 anti-HIV-1 drugs over the 34 months, and contains following amino acid substitution in the protease-encoding region  
 715 compared to the consensus type B sequence cited from the Los Alamos database; L10I, K14R, L33I, M36I, M46I,  
 716 F53I, K55R, I62V, L63P, A71V, G73S, V82A, L90M, and I93L. HIV-1<sub>ATV<sup>R</sup>5μM</sub> was generated previously by long-  
 717 term selection experiment using HIV-1<sub>NL4-3</sub> with increasing concentration of ATV (51), and contains following 10  
 718 amino acid substitution in the protease-encoding region compared to the wild-type HIV-1<sub>NL4-3</sub>; L23I, E34Q, K43I,  
 719 M46I, I50L, G51A, L63P, A71V, V82A, and T91A.

720

721 **Table 3: Comparison of ACAi-028 cytotoxicity against other inhibitors in various cell lines.**

| Cells             | CC <sub>50</sub> (μM) |      |         |
|-------------------|-----------------------|------|---------|
|                   | ACAi-028              | PF74 | Ebselen |
| Li-7 (hepatocyte) | >100                  | >100 | >20     |
| HLE (hepatocyte)  | 72.3                  | >100 | >20     |
| HEK293 (kidney)   | 62.6                  | >100 | >20     |
| MT-4 (lymphocyte) | >100                  | >100 | >20     |
| MT-2 (lymphocyte) | 86.6                  | >100 | >20     |
| PBMC              | >100                  | n.d. | n.d.    |

722 Cells were incubated with the respective compounds for one week before cytotoxicity was quantified using MTT  
 723 assay.

724

725 **Table 4: Comparison of ACAi-028 binding position and mechanism with other CA inhibitors.**

726

| CA  | Group | Name                    | Binding region          | C.M. | Stage of inhibition | Ref.   |
|-----|-------|-------------------------|-------------------------|------|---------------------|--------|
| NTD | New   | ACAi-028                | Q13, S16, T19           | ↓    | Early               |        |
|     | A     | CAP-1                   | E28, E29, F32, V59, H62 | ↓    | Late                | 13, 14 |
|     |       | BD-1, BM-1              | F32, H62                | ↓    | Late                | 20     |
|     | B     | PF74                    | Q67, K70, T107          | ↑    | Early/Late          | 15     |
|     |       | (GS-CA1)<br>Lenacapavir | Q67, K70, T107          | ↑    | Early/Late          | 17, 18 |
|     | C     | I-XW-053                | I37                     | ↓    | Early               | 21     |
|     |       | C1                      | E98, H120, I124         | ↓    | Late                | 22, 44 |
| CTD | D     | Ebselen                 | C198, C218              | ↑    | Early/Late          | 16     |
|     | B     | PF74                    | Y169, L172, R173, Q179  | ↑    | Early/Late          | 15     |
|     |       | (GS-CA1)<br>Lenacapavir | Y169, L172, R173, Q179  | ↑    | Early/Late          | 17, 18 |
|     |       | I-XW-053                | R173                    | ↓    | Early               | 21     |

727

728

C.M., CA Multimerization ↑ Increase, ↓ Decrease

729

Ref., Reference.

730

Binding region of ACAi-028 determined using virtual docking simulation (Fig. 1). ACAi-028 is an early stage inhibitor (Fig. 2) that induces reduction of capsid multimerization (Fig. 7). Please refer to the references listed for details of the mechanisms of the other CA inhibitors.

732

733

## 734 Figure legends

735 **Figure 1. Profile of CA, target cavity, and *in silico* docking simulations of ACAi-**

736 **028**

737 (A) 3D structures of full-length CA (PDB accession number 4XFX) shown in tan, and closed-up of

738 ACAi-028-targeted cavity in the CA-NTD shown in light blue are on the left side. The CA comprises

739 a  $\beta$ -hairpin in green, CypA-BL in purple, eleven  $\alpha$ -helices: H1-11 in pink, and a  $3_{10}$ -helix in yellow on

740 the right side. (B) The procedure of *in silico* screening to identify as candidate anti-CA inhibitors. (C)



741 The chemical structure of ACAi-028. **(D)** The docking simulation result of ACAi-028 with the target  
742 cavity is shown. Hydrogen bond interactions between molecular surface of CA CA-NTD<sub>1-146/Δ87-99G</sub>  
743 crystal and ACAi-028 are indicated in dotted lines. The carbons of CA and ACAi-028 are shown in  
744 tan and white colors, respectively. Nitrogen atoms, oxygen atoms, hydrogen atoms, and bromine atoms  
745 are shown in blue, red, white, and brown, respectively. ACAi-028 forms two H-bonds interaction with  
746 the side-chains of Gln13 and Thr19 (inter-atomic distances of 1.87 Å and 1.89 Å, respectively) and H-  
747 bond interaction with the main-chain of Ser16 (inter-atomic distance of 2.06 Å). Molecular graphics  
748 was performed with UCSF Chimera (<https://www.rbvi.ucsf.edu/chimera>). All docking simulations  
749 were performed with SeeSAR and FlexX version 10 (BioSolveIT GmbH, Sankt Augustin, Germany).

750

## 751 **Figure 2. The early-stage inhibition of ACAi-028 in the HIV-1 life cycle**

752 **(A)** Fusion assay was conducted between 293T and COS-7 cells in the presence of ACAi-028 or  
753 AMD3100. Results of the luciferase intensity are shown as percentage compared to Dimethyl sulfoxide  
754 (DMSO) controls. AMD3100 is a fusion inhibitor against CXCR4 co-receptors of X4-tropic HIV-1  
755 **(B)** The early-stage inhibition of ACAi-028 against X4-tropic (HIV-1<sub>LAI</sub> and HIV-1<sub>NL4-3</sub>), R5-tropic  
756 (HIV-1<sub>Ba-L</sub> and HIV-1<sub>JR-FL</sub>), VSV-G HIV-1<sub>NL4-3</sub>, and HIV-2<sub>ROD</sub> strains were measured using TZM-bl  
757 cells. Luciferase activity was measured at 48 h post-infection and is shown as a percentage normalized  
758 to DMSO controls. **(C)** Time-of-addition assay was conducted by the addition of ACAi-028 and  
759 various early-stage inhibitors such as AMD3100, AZT, EFV, PF74, and RAL to TZM-bl cells in 2 h

760 intervals up to 10 h. Data was shown as percentage every 2 h and normalized to DMSO controls (**D**)  
761 Effects of ACAi-028, PF-74, and EFV on RT activity were measured by colorimetric reverse  
762 transcriptase assay. OD<sub>405</sub> values were measured and shown as percentages. All assays were performed  
763 in duplicate, and error bars indicate  $\pm$ SD from at least two independent experiments. Statistical  
764 significance was examined using Student's t-test; \*, P < 0.05, \*\*, P < 0.005.

765

### 766 **Figure 3. Effect of ACAi-028 on the latestage of the HIV-1 life cycle**

767 (**A**) Gag-pol proteolytic processing and virus production were examined by the western blotting with  
768 anti-Gag antibody in the cell lysate and (**B**) measuring the p24 levels in the supernatant of 293T cells  
769 which were transfected with pNL<sub>4-3</sub> in the presence of ACAi-028 (10  $\mu$ M), PF74 (10  $\mu$ M), Ebselen  
770 (10  $\mu$ M), or DRV (2  $\mu$ M). After the virions in the supernatants were purified, Gag-pol proteolytic  
771 processing and HIV-1 maturation of the virions were examined by (**C**) the western blotting with anti-  
772 Gag on the left side and anti-IN antibody on the right side, and by (**D**) TZM-bl assay at the bottom. All  
773 assays were performed in duplicate, and error bars indicate  $\pm$ SD from three independent experiments.  
774 Statistical significance was examined using Student's t-test; \*, P < 0.05, \*\*, P < 0.005.

775

### 776 **Figure 4. Amino acid residues and structures of CA-NTD among HIV and SIV**

777 (A) Alignment of CA-NTD (residues from 1 to 45) among laboratory HIV-1 strains, SIV<sub>CPZ</sub>, HIV-2  
778 strains, and SIV<sub>smn</sub>. (B) Representation of frequencies of CA-NTD (residues from 1 to 50) from 6144  
779 sequences of all HIV-1 subtypes (Los Alamos HIV sequence database filtered web alignment) using  
780 the WebLogo 3.7.4 application (<http://weblogo.threeplusone.com/create.cgi>). Highlighted in red are  
781 the five residues of (Pro1, Gin13, Ser16, Thr19, and Glu45) that constitute the ACAi-028 binding  
782 cavity. Above each of these residues is the percentage consensus as determined by Jalview 2.11.1.4  
783 program (<http://www.jalview.org>) (52). (C) The target cavity on the surface of CA-NTD<sub>1-146/Δ87-99G</sub>  
784 monomer used in the flexible docking simulation is shown in tan in the left panel. CA-NTD<sub>HIV-2</sub> (CA-  
785 NTD<sub>ROD</sub>) monomer ([PDB] accession number 2WLV) and corresponding target cavity is shown in  
786 cyan in the right panel. The bottom panel shows merged image of the CA-NTD of both strains. (D)  
787 The docking simulation result of ACAi-028 with the target cavity in CA-NTD<sub>ROD</sub> is shown. Hydrogen  
788 bond interactions between molecular surface of CA-NTD<sub>ROD</sub> and ACAi-028 were not observed unlike  
789 the docking result between CA-NTD<sub>HIV-1</sub> and ACAi-028. The carbons of CA and ACAi-028 are shown  
790 in cyan and white colors, respectively. Nitrogen atoms, oxygen atoms, hydrogen atoms, and bromine  
791 atoms are shown in blue, red, white, and brown, respectively. Docking simulations were performed  
792 with SeeSAR and FlexX version 10. Molecular graphics was performed with UCSF Chimera.

793

794 **Figure 5. ACAi-028 interacts directly and non-covalently with CA monomer**

795 ESI-MS spectra of ACAi-028 (50  $\mu$ M) and Ebselen (50  $\mu$ M) binding to CA. (A) Black arrows  
796 represent CA monomer peaks of the charged ions. Deconvoluted ESI-MS spectrum of CA monomer  
797 is shown on the right side. (B) ESI-MS spectra of CA binding to ACAi-028 are shown in red arrows.  
798 Deconvoluted ESI-MS spectra of CA monomer or CA monomer binding to ACAi-028 are shown on  
799 right side. (C) Under denaturing condition, acetonitrile and trifluoroacetic acid are added to a mixture  
800 CA of ACAi-028. Black arrows indicate CA monomers failed to interact with ACAi-028.  
801 Deconvoluted ESI-MS spectra is shown on the right side. (D) Under the same condition as (C), black  
802 arrows indicate CA monomers and red arrows represent CA monomer binding covalently to one (left)  
803 or two (right) ebselen, respectively. Each deconvoluted ESI-MS spectrum is shown on the right side.

804

805 **Figure 6. Effect of ACAi-028 on CA thermal stability.**

806 (A) DSF was performed using SYBR-Orange dye in the presence of methanol shown in black circle,  
807 a different concentration (1, 10, and 50  $\mu$ M) of ACAi-028 shown in grey squares, and PF74 (10  $\mu$ M)  
808 shown in black triangle to examine CA stability. (B) Graphical representation of Tm changes ( $\Delta$ Tm  
809 50) from (A) are shown for ACAi-028 and PF74. (C) DSF of CA<sub>S16E</sub> and CA<sub>T19A</sub> were tested in high  
810 concentration of ACAi-028 (10  $\mu$ M and 50  $\mu$ M shown in light and dark grey squares, respectively).  
811 Black circle indicates in methanol as a control. (D) Graphical representation of  $\Delta$ Tm 50 from (C) are  
812 shown for (10 and 50  $\mu$ M) ACAi-028. All assays were performed in triplicate, and error bars indicate

813  $\pm$ SD from three independent experiments. Statistical significance was examined using Student's t-test  
814 (\*,  $P < 0.05$ , \*\*,  $P < 0.005$ ).

815

### 816 **Figure 7. Effect of ACAi-028 on CA multimerization.**

817 (A) CA multimerization assay was performed by the addition of a high sodium buffer (the ratio of 150  
818 mM sodium phosphate to 5M sodium phosphate buffer is five to five) in the presence of ACAi-028 (4  
819 and 40  $\mu$ M), PF74 (4  $\mu$ M), and RAL (40  $\mu$ M). Turbidity of the mixtures was measured at OD<sub>350</sub> over  
820 a period of 60 minutes. PF74 and RAL are used as positive or negative controls, respectively.  
821 Representative data is shown from three independent experiments. (B) CA<sub>WT</sub> multimerization was  
822 compared to CA<sub>T19A</sub>, CA<sub>S16E</sub>, and CA<sub>M185A</sub> multimerization (The ratio of 150 mM to 5M sodium is  
823 five to five). Effects of ACAi-028 (4 and 40  $\mu$ M) on (C) CA<sub>S16E</sub> multimerization in higher sodium  
824 concentration (the ratio of 150 mM to 5M sodium is four to six), and (D) CA<sub>T19A</sub> multimerization (the  
825 ratio of 150 mM to 5M sodium is five to five) are shown. Representative data is shown from three  
826 independent experiments.

827

### 828 **Figure 8. Interaction of ACAi-028 with the binding pockets of CA in the** 829 **hexameric state.**

830 (A) Left panel shows the structure of a CA hexamer ([PDB] accession number 3H4E). CA dimer  
831 extracted from the CA hexamer was used in the flexible docking simulation. Right panel shows the

832 CA hexamer with docking poses of ACAi-028. **(B)** The structure of a CA dimer extracted from a CA  
833 hexamer ([PDB] accession number 5MCX) and the docking result of ACAi-028 to the CA dimer is  
834 shown. ACAi-028 formed two H-bond interactions with the main-chains of Leu43 and Glu45 residues  
835 which are located at the monomer-monomer interface of one CA monomer in the CA dimer extracted  
836 from the CA hexamer. Docking simulations were performed with SeeSAR and FlexX version 10.  
837 Molecular graphics was performed with UCSF Chimera.

838

839 **Figure 9. Profiles of ACAi-028 and CA inhibitors.**

840 ACAi-028 and representative CA inhibitors previously reported are categorized into groups new, A, B,  
841 C, and D. Names, chemical structures, effects of CA multimerization, inhibition stages of the HIV-1  
842 life cycle, putative and representative binding regions of the CA inhibitors are shown.

A

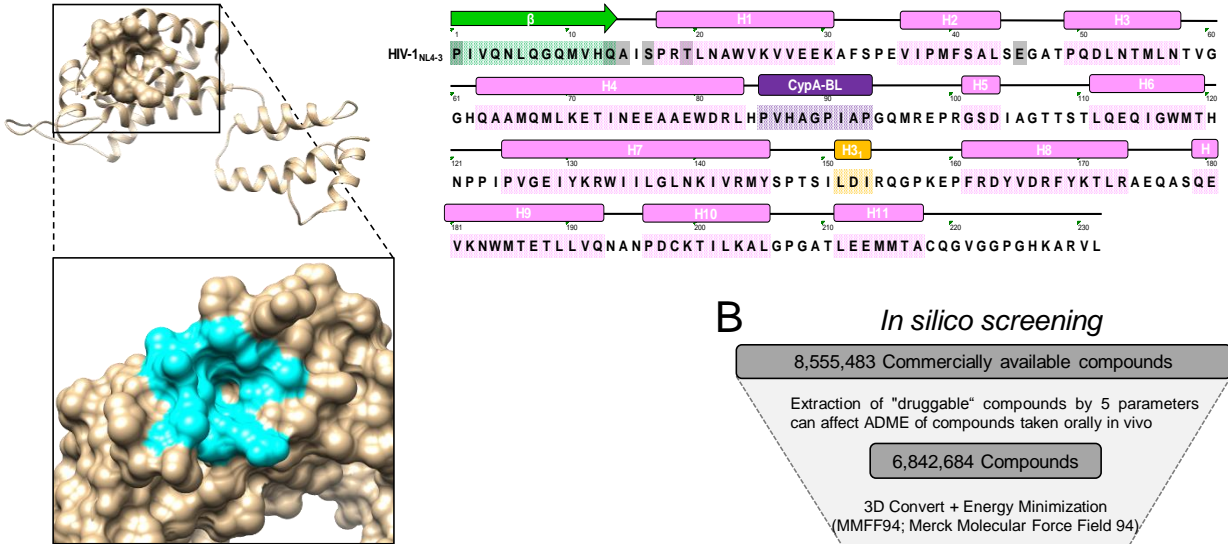

B

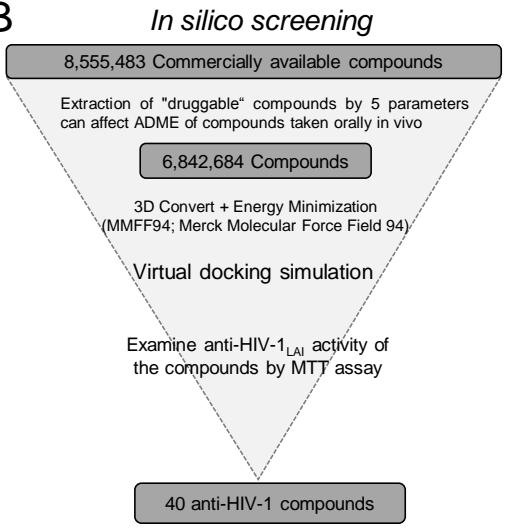

C

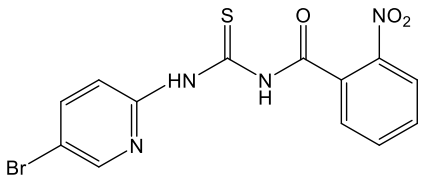

D

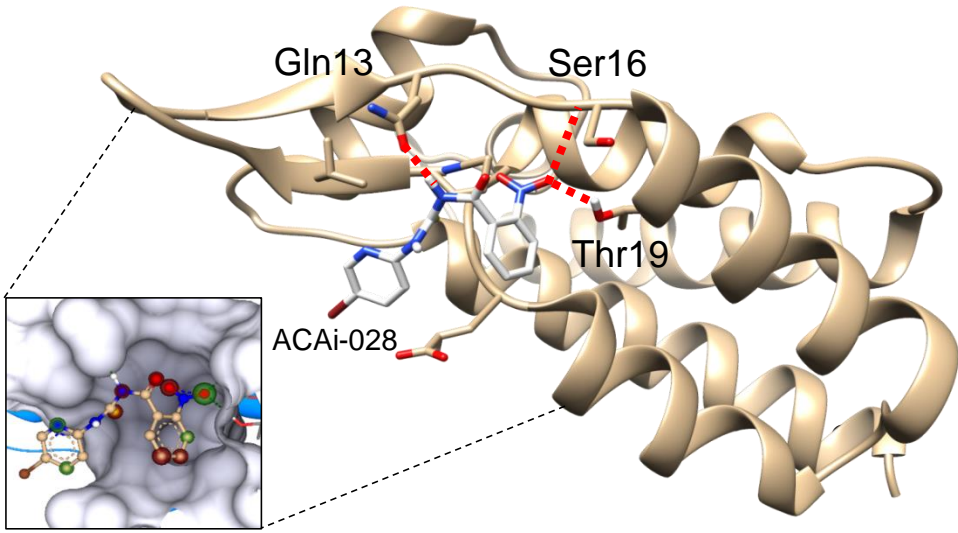

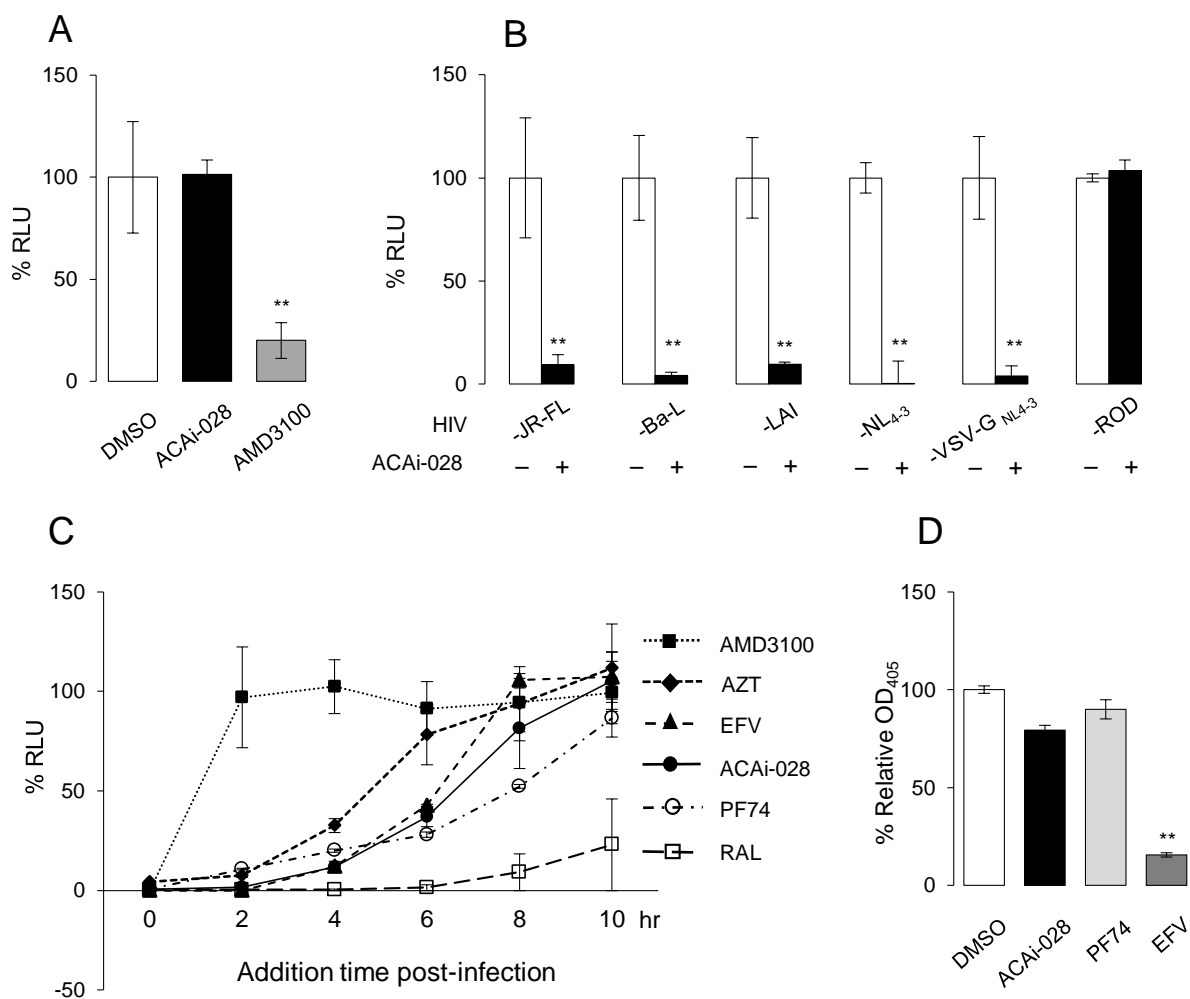



**A**

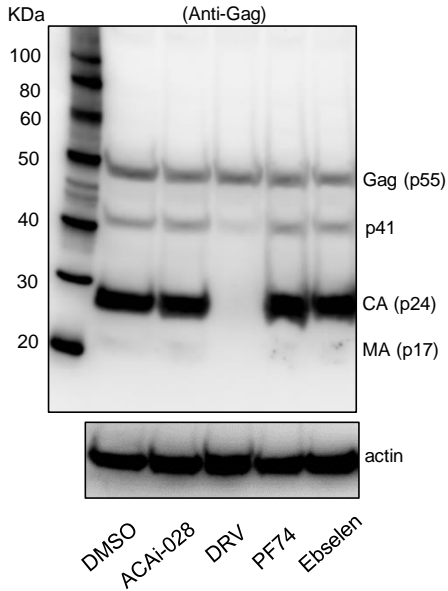

**B**

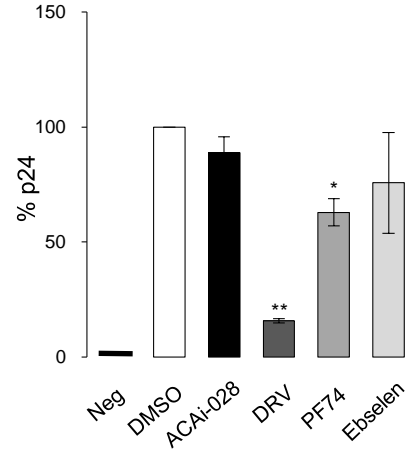

**C**

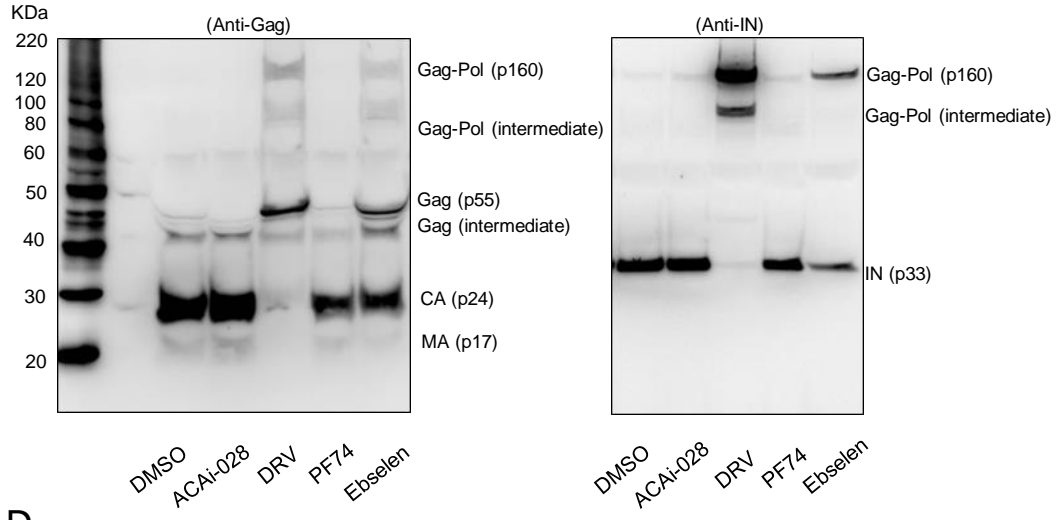

**D**

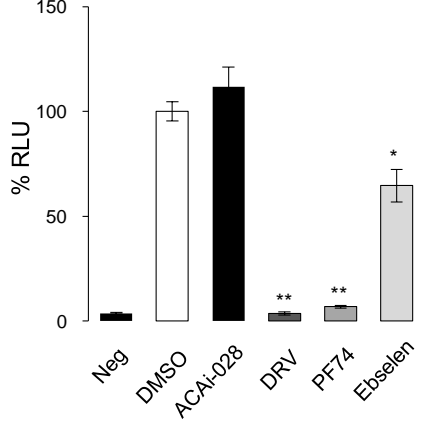

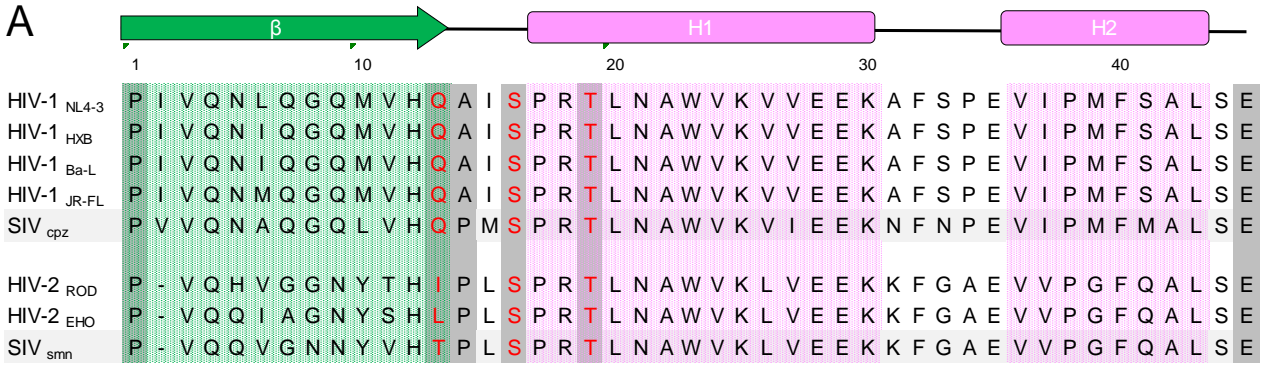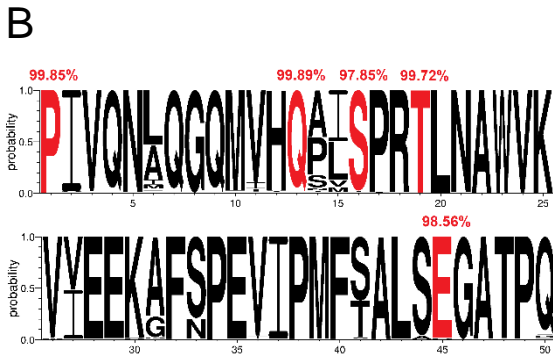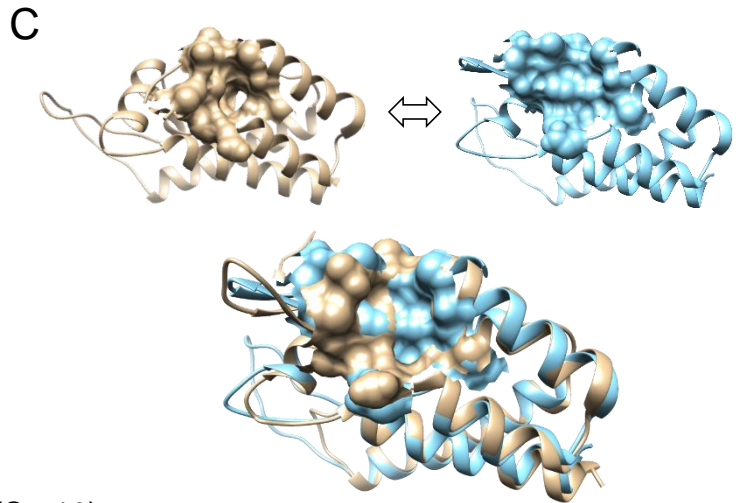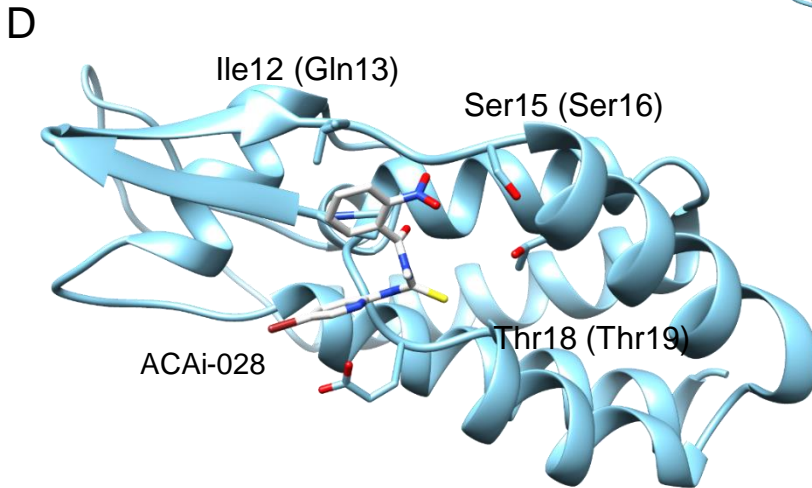

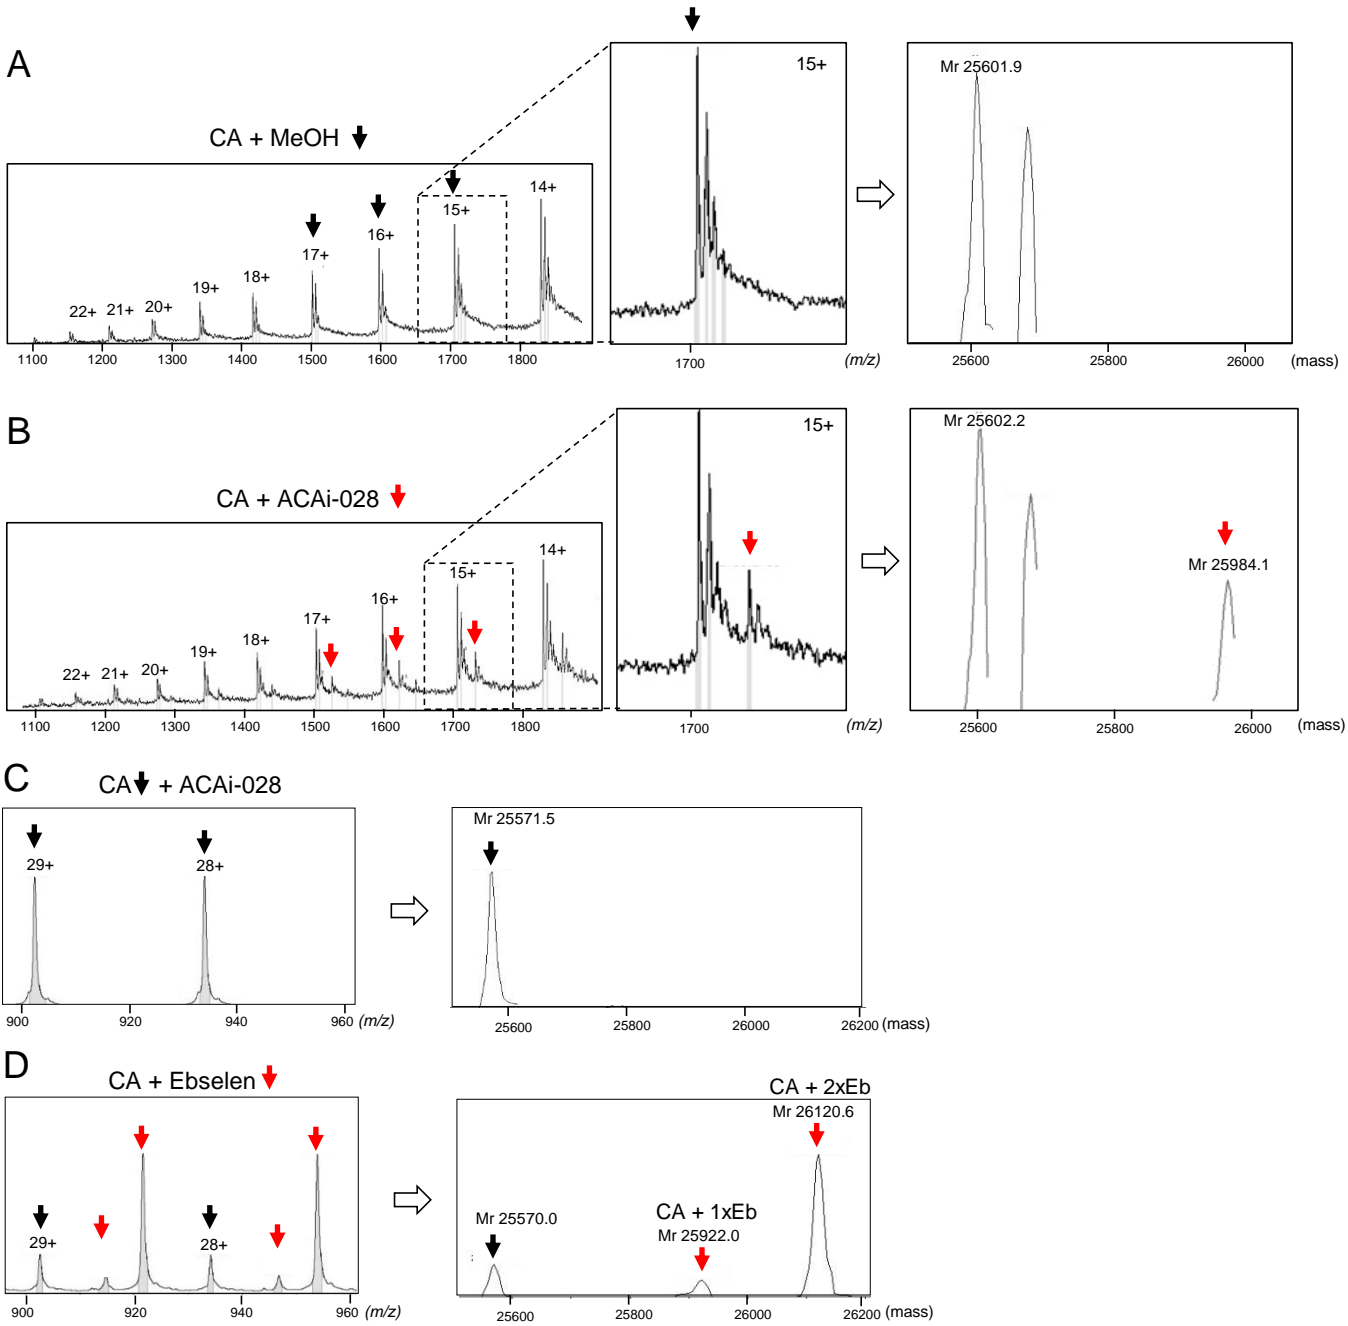

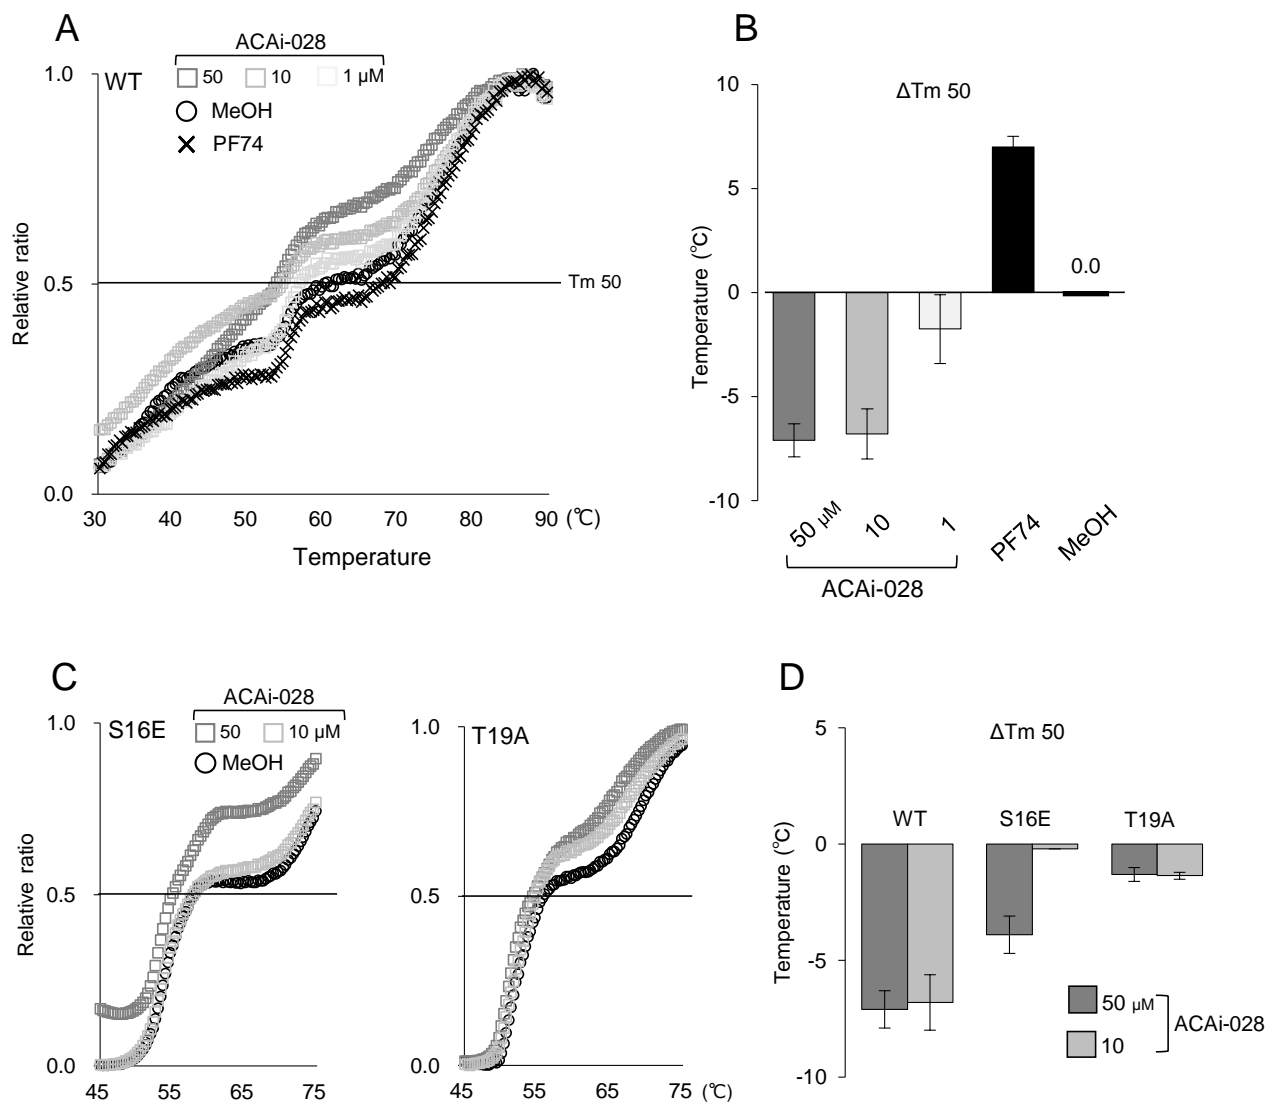

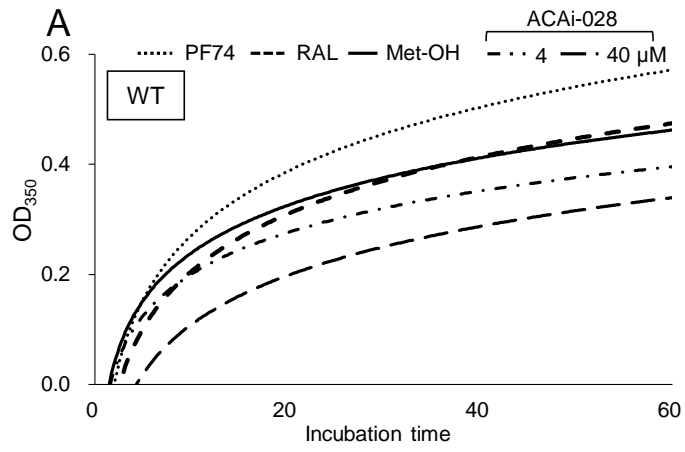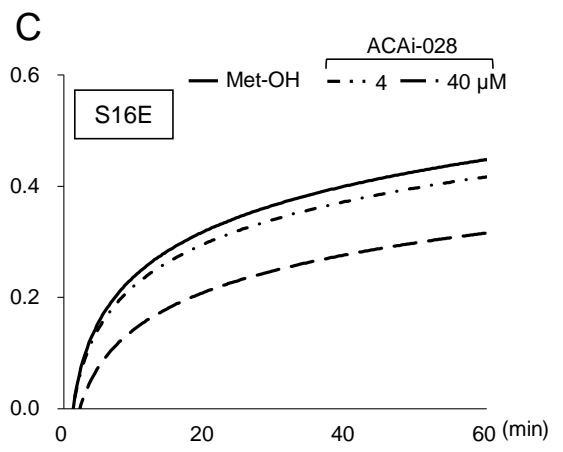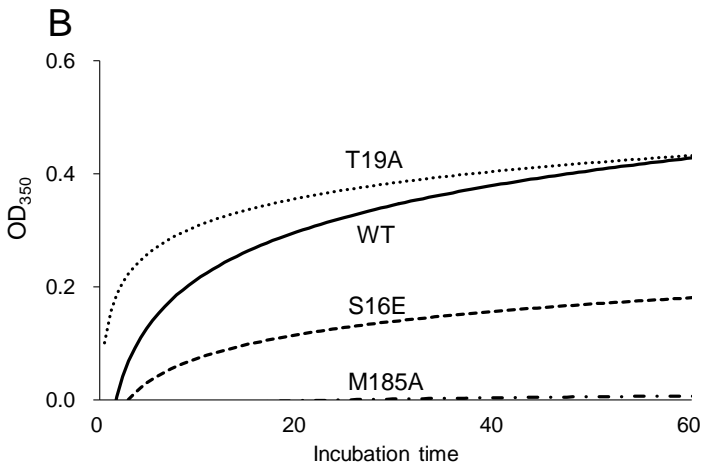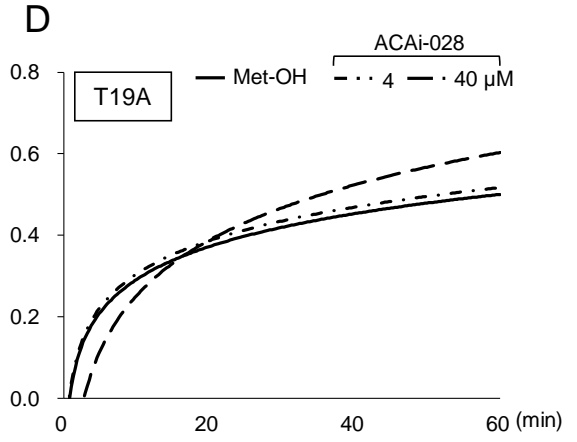

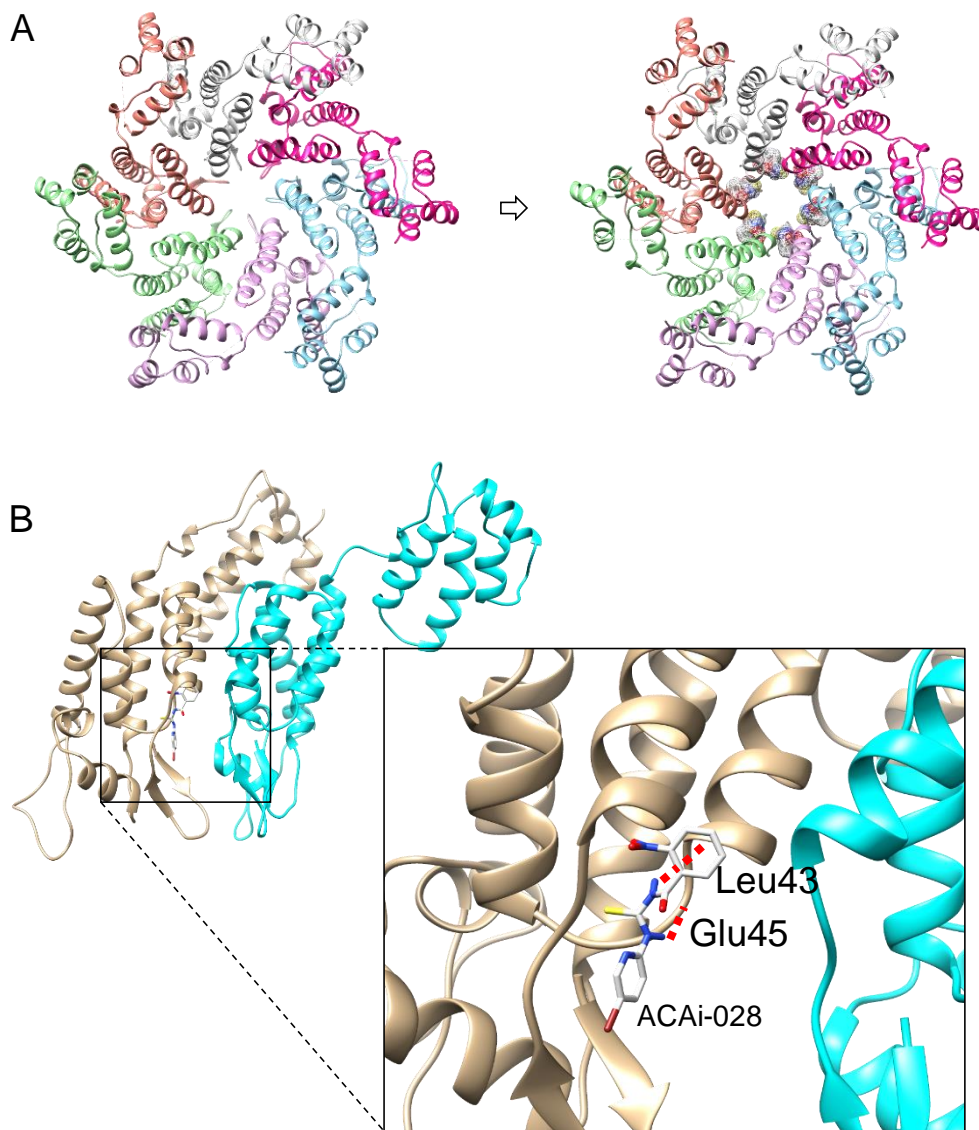

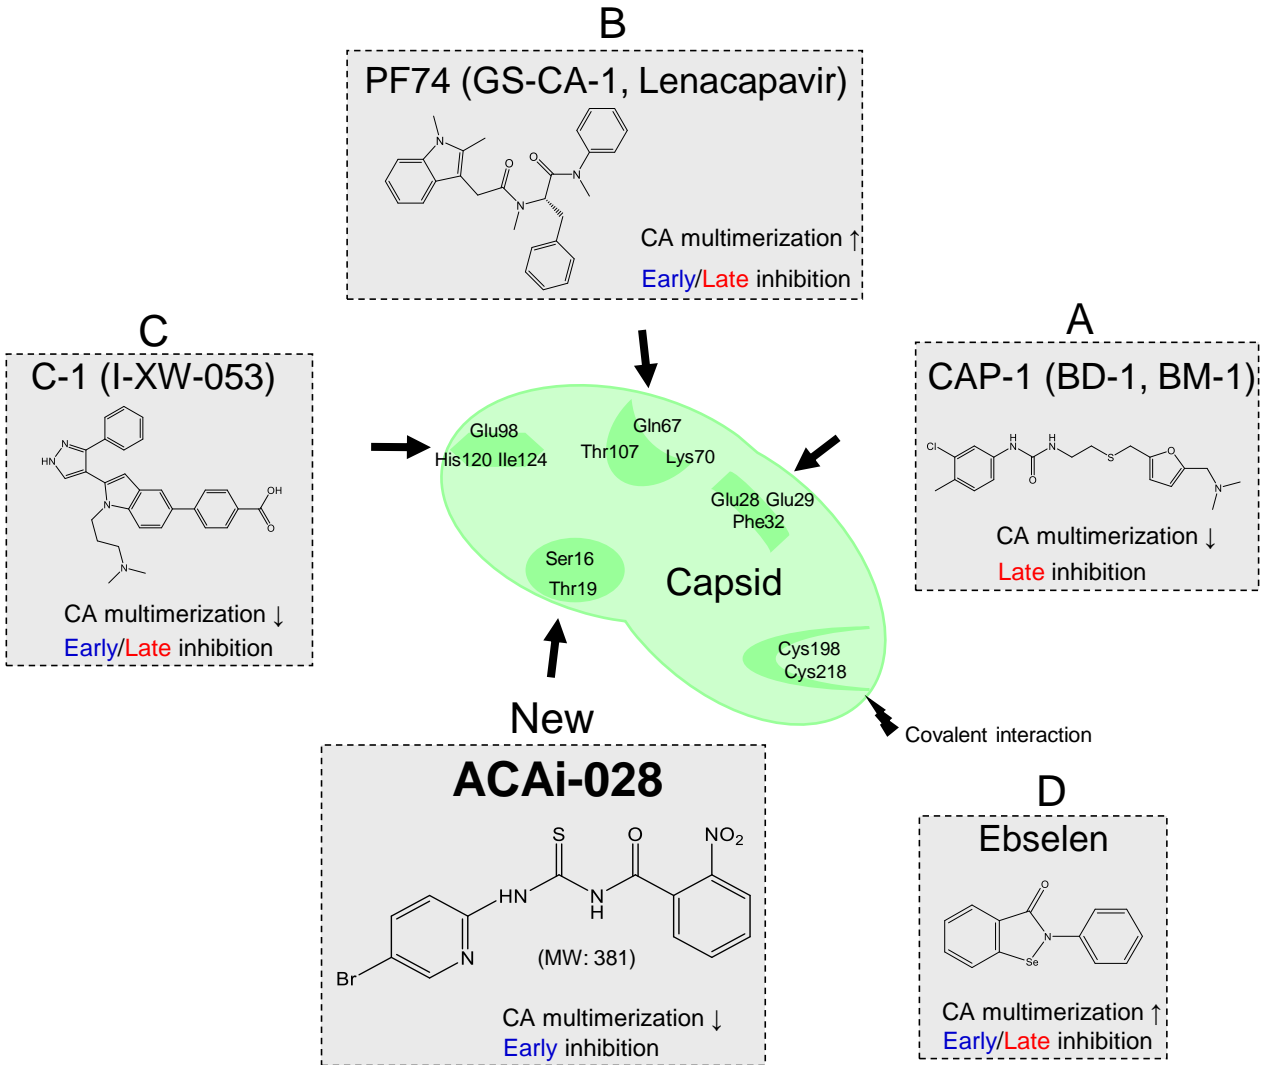

Source: https://www.biorxiv.org/content/10.1101/2021.05.18.444758v1.full.pdf
